# Supplementary material
Source: PubMed Central journal article supplement (PMC8341172)
Supplement: CB-002-D1CB00009H-s002.pdf [file CB-002-D1CB00009H-s002.pdf]

## SUPPORTING INFORMATION

### BIOORTHOGONAL PROTEIN LABELLING ENABLES THE STUDY OF ANTIGEN PROCESSING OF CITRULLINATED AND CARBAMYLATED AUTO-ANTIGENS

Tyrza van Leeuwen<sup>a,§</sup>, Can Araman<sup>a,§</sup>, Linda Pieper-Pournara<sup>a</sup>, Arieke S. B. Kampstra<sup>b</sup>, Thomas Bakkum<sup>a</sup>, Mikkel H. S. Marqvorsen<sup>a</sup>, Clarissa R. Nascimento<sup>a</sup>, G. J. Mirjam Groenewold<sup>a</sup>, Willemijn van der Wulp<sup>a</sup>, Marcel G. M. Camps<sup>c</sup>, George M. C. Janssen<sup>d</sup>, Peter A. van Veelen<sup>d</sup>, Gerard J. P. van Westen<sup>e</sup>, Antonius P. A. Janssen<sup>f</sup>, Bogdan I. Florea<sup>a</sup>, Herman S. Overkleeft<sup>a</sup>, Ferry A. Ossendorp<sup>c</sup>, René E. M. Toes<sup>b,\*</sup> and Sander I. van Kasteren<sup>a,\*</sup>

<sup>a</sup>Department of Bio-organic Synthesis and Institute of Chemical Immunology, Leiden Institute of Chemistry, Leiden University, Leiden, The Netherlands;

<sup>b</sup>Department of Rheumatology, Leiden University Medical Center, Leiden, The Netherlands

<sup>c</sup>Department of Immunology, Leiden University Medical Center, Leiden, The Netherlands;

<sup>d</sup>Center for Proteomics and Metabolomics, Leiden University Medical Center, Leiden, The Netherlands;

<sup>e</sup>Computational Drug Discovery, Drug Discovery and Safety, LACDR, Leiden University, Leiden, The Netherlands;

<sup>f</sup>Department of Molecular Physiology, Leiden Institute of Chemistry and the Onco Institute, Leiden University, Leiden, The Netherlands;

<sup>§</sup>: These authors contributed equally

<sup>\*</sup>: Correspondence to: Sander I. van Kasteren: [s.i.van.kasteren@chem.leidenuniv.nl](mailto:s.i.van.kasteren@chem.leidenuniv.nl)

Rene E. M. Toes: [r.e.m.toes@lumc.nl](mailto:r.e.m.toes@lumc.nl)

## **Materials and Methods:**

### **Chemicals**

Chemical reagents for buffer preparation and chemical synthesis were purchased from Acros (Belgium), Chem-Lab (Belgium), Honeywell Riedel-de Haën (Germany), Merck (The Netherlands), Novabiochem (The Netherlands), Sigma Aldrich (The Netherlands), Sigma Life Sciences (The Netherlands) or Sphaero Hispanagar (Spain) and used without further purification unless stated otherwise.

Fluorophores (Alexa Fluor 488 Azide, Alexa Fluor 488 Alkyne, Alexa Fluor 647 Azide and Alexa Fluor 647 Alkyne), were purchased from Thermo Fisher Scientific.

### **Cell Culture**

#### ***Bone Marrow Dendritic Cell Differentiation***

Bone marrow (BM) was isolated from 8-12 weeks old C57BL/6 mice kept under specific pathogen-free conditions (Strain: C57BL/6NHsd, H-2<sup>b</sup> Haplotype; Envigo Inc., Huntingdon, United Kingdom) essentially as described<sup>1</sup>. Femurs and tibiae of female or male mice were removed and surrounding tissue was removed. Thereafter, intact bones were left in 70% ethanol for 2–5 min and washed with sterile PBS. The bone marrow was flushed from femurs and tibia after removal of the bone-ends using pre-warmed IMDM (Sigma, ref# I3390) using a 20 mL Syringe with a 0.45 mm x 23 mm hypodermic needle (G26, Terumo Europe, NN-2623R). The BM was then homogenized through a 70 µm cell strainer (Falcon, ref# 352350).

The cells were then centrifuged 5 min at 350 g and resuspended in 10 mL IMDM supplemented with 8% heat-inactivated fetal calf serum (FCS, Sigma, ref# F0804, lot# 015M3344), 2 mM Glutamax<sup>TM</sup> (GIBCO, ref# 35050-038), 20 µM β-Mercaptoethanol (Gibco, ref# 31350010), 50 IU/mL penicillin and 50 µg/mL streptomycin, and recombinant GM-CSF (20 ng/mL, Peprotech, ref# 315-03) to a concentration of  $0.5 \times 10^6$  cells/mL. The cells were incubated in non-adhesive petri dishes at 37°C, 5% CO<sub>2</sub>, under humidified air.

#### ***OT-I and OT-II isolation and Culturing***

OT-I/CD45.1 mice, which have a transgenic Vα2Vβ5 TCR specific for the OVA<sub>257–264</sub> epitope in association with H2-Kb, were bred in the specific pathogen-free animal facility of the Leiden University Medical Center (LUMC). The animal experiments have been reviewed and approved by the animal experimental committee of Leiden University. OT-II mice (CD4<sup>+</sup> T-cell transgenic mice expressing a TCR recognizing the OVA-derived T<sub>h</sub> epitope ISQAVHAAHAEINEAGR in association with I-Ab)<sup>2</sup> were bred and kept at the LUMC animal facility as well as at the Leiden Advanced Drug Research Centre (kindly provided by Dr. Bram Slutter) under specific pathogen-free conditions. All mice were used at 8–12 weeks of age.

Briefly, spleens from OT-I and OT-II TCR transgenic mice were harvested and homogenized using a 70 µm cell strainer. Untouched CD8<sup>+</sup> or CD4<sup>+</sup> T-cells were isolated with a Miltenyi mouse T-cells isolation kit for CD8<sup>+</sup> or CD4<sup>+</sup> T-cell negative selection, according to the manufacturer's instructions. T-cell purity was typically higher than 85%.

#### ***D1 dendritic cells***

D1 cells were cultured as described previously<sup>3</sup>. Briefly, cells were cultured in “complete IMDM” containing 10% heat-inactivated FCS, 100 IU/ml penicillin, 50 µg/ml streptomycin, 2 mM L-glutamine, and 50 µM β-mercaptoethanol. This medium was supplemented with 30% fibroblast supernatant from NIH/3T3 cells (collected and filtered from confluent cultures) containing 10-20 ng/ml mouse rGM-CSF. D1 culture conditions were 5% CO<sub>2</sub> at 37°C.

#### ***RAW 264.7 cells***

RAW macrophages were cultured as described previously<sup>4</sup>. Briefly, cells were cultured in DMEM (Sigma-Aldrich) containing 10% heat-inactivated FCS, 2 mM Glutamax<sup>TM</sup>, 50 IU/mL penicillin and 50 µg/mL streptomycin. RAW 264.7 culture conditions were 5% CO<sub>2</sub> at 37°C.

### **Human Cell Culture Protocols**

#### ***Dendritic cell generation***

HLA-DRB1\*04:01/-DQA1\*03:01/-DQB1\*03:02 (HLA-DR4/-DQ8)-positive buffy coats were received from Sanquin Bloodbank. Peripheral Blood Mononuclear Cells (PBMCs) were isolated with Ficoll-paque gradient and CD14<sup>+</sup> cell isolation was performed with MACS beads according to the manufacturers protocol with slight alterations (Cat#: 130-097-052, Miltenyi Biotec). In short, PBMCs were incubated with 10 µL/10<sup>7</sup> cells CD14<sup>+</sup> microbeads and incubated for 15' at 4°C. Coated PBMCs were run over an LS column twice to purify the CD14<sup>+</sup> fraction. To differentiate the CD14<sup>+</sup> cells to dendritic cells, the CD14<sup>+</sup> cells were counted and seeded at  $5 \times 10^5$  cells/well in a 24-wells plate, in medium (IMDM, Cat#:12440-053, Gibco) supplemented with 1% Glutamax, 1% penicillin/streptomycin, 8% Fetal Calf Serum (FCS), 800 U/mL GM-CSF (Cat#:300-03, Peprotech) and 500 U/mL IL-4 (Cat#:200-04, Peprotech) and cultured for 6 days. After differentiation of the CD14<sup>+</sup> cells to immature dendritic cells, the cells were fed with 200 µg POI per well and were allowed to take it up for ~18 hours. Peptides were added 1 hour before maturation at 10 µg/mL.

Subsequently, the dendritic cells were matured with a maturation cocktail: 100 ng/mL GM-CSF (Cat#: 300-03, Peprotech), 15 ng/mL TNF $\alpha$  (Cat#: 210-TA-005, R&D), 10 ng/mL IL-1 $\beta$  (Cat#: 201-LB-005, R&D), 10 ng/mL IL-6 (Cat#: 200-06, Peprotech), 1  $\mu$ g/mL PGE2 (Cat#: 14010, Cayman Chemical), 500 U/mL IFN $\gamma$  (Cat#: 300-02, Peprotech). Dendritic cells were allowed to mature for ~30 hours before they were harvested and co-cultured with the T-cells.

#### ***Jurkat Triple Parameter Reporter (TPR) cell line***

A Jurkat 76 cell line, positive for CD4 (by transduction) and NFAT-eGFP, NFkB-CFP and AP-1-mCherry (by transduction) was kindly provided by Mirjam Heemskerk from the LUMC.<sup>5, 6</sup> The cell line was transduced with Vin-DERAA-specific T-cell receptor in the group of Heemskerk by R. Hagedoorn, as has been previously described<sup>6</sup>. The transduced Jurkat T-cells were selected on their TCR expression and sorted in single cells. One of these clones was shown to be highly responsive and was used for all future experiments described here. The Jurkat-T-cells are cultured in IMDM supplemented with 1% glutamax, 1% Penicillin/streptomycin and 8% FCS.

### **Recombinant protein expression**

#### ***Vinculin***

The plasmid (pET3d, Amp<sup>R</sup>, Novagen) encoding of wild type Vinculin<sub>435-742</sub> (hereafter referred to as wt-Vin) was transformed into the methionine auxotroph *E. coli* B834(DE3) (met-aux, Genotype: F- ompT hsdSB (rB- mB-) gal dcm met(DE3), Novagen #ref 69041). The protein was expressed from the overnight culture of a single colony. 100 mL of this overnight culture (o.n., Ampicillin 50  $\mu$ g/mL, 18 h, 37°C, and 150 rpm) was used for the inoculation per 1 L LB medium (Ampicillin 50  $\mu$ g/mL, 37°C, 150 rpm). The cells were grown to an OD<sub>600</sub> of 0.6-1.0 prior to the addition of 1 mM isopropyl- $\beta$ -D-1-thiogalactopyranoside (IPTG) for 18 h (30°C, 150 rpm). The cells were harvested by centrifugation (4000 g, 20 min, 4°C) and washed once with Tris-buffered saline (TBS; 50 mM Tris-HCl, 300 mM NaCl, pH 8.0).

#### ***Cell lysis and affinity purification of Vinculin<sub>435-742</sub>***

Cell pellets were weighed, resuspended in TBS to 1-4 g/mL, prior to lysis by French Press (1.5-kbar, Stansted, Pressure Cell Homogeniser). Lysed cells were centrifuged (15,000 g, 1 h, 4°C). The soluble fraction was then loaded onto a Ni-NTA affinity resin (Thermo Fisher Scientific, catalogue no. 88221) pre-equilibrated with TBS. After incubation for 1 h under gentle rotation, the beads were first washed with 2 column volumes (CV) of washing buffer 1 (TBS, 10 mM Imidazole, pH 8.0) and subsequently with 3 CV washing buffer 2 (TBS with 50 mM Imidazole). The resin was then treated with elution buffer (TBS, 250 mM Imidazole, pH 8.0, 2 mL) to obtain the protein of interest (POI) in ~ 10 mg/mL, which was then exchanged into TBS using a Sephadex G25 resin (PD-10 column; GE Healthcare).

#### ***Expression of bioorthogonal vinculin variants***

A single colony of *E. coli* B834 transformed with pET3d-Vin was grown in 50 mL LB augmented with 1% w/v glucose and grown overnight. The next morning, the culture was diluted 1:100 with fresh LB media and cells were grown to an OD<sub>600</sub> of 0.5-0.6. The resulting culture was then centrifuged (2000 g, 10 min, 4°C) and the supernatant discarded. The cells were washed and resuspended in SelenoMet<sup>TM</sup> media (Molecular Dimensions, USA) without additional methionine. The cells were incubated at 37°C for 30 min, followed by 30 minutes at 30°C (180 rpm) after which either L-Azidohomoalanine (Aha, 0.4 mM final concentration) or D,L-Homopropargylglycine (Hpg, 0.8 mM final concentration) was added. The cells were incubated for a further 30 minutes at 30°C (OD<sub>600</sub> 0.7-1.0), the culture was induced with 1 mM IPTG for 18 h. Cell lysis and purification were then performed as described above.

Incorporation efficiency of the bioorthogonal amino acids was analyzed by LC-MS and in-gel fluorescence using bioorthogonal ligation with appropriately modified (i.e. Azide/Alkyne) Cy5 and Alexa 488 dyes.

#### ***Ovalbumin expression***

The gene for the wt, full length Ovalbumin (hereafter referred to as wt-Ova, accession number V00383) was cloned into the pMCSG7 vector as described elsewhere<sup>7</sup> and transformed into the methionine auxotroph expression strain, namely *E. coli* B834(DE3). The construct contained an N-terminal MHHHHHHSSGVDLG***TENLYFGS****NA* sequence for Ni-NTA purification (underlined) and a TEV-cleavage (italic bold) site. The expression was performed as described for wt-Vinculin.

#### ***Cell Lysis and purification of Ova***

After the expression period, the cells were harvested by centrifugation (20 min, 3000 g). The pellet was resuspended in lysis buffer (50 mM NaH<sub>2</sub>PO<sub>4</sub>, 300 mM NaCl, 10 mM imidazole, pH 8.0, 10 % glycerol, 1 mg/mL Lysozyme (Amresco, ref#0663-5G), complete EDTA-free protease inhibitor (Roche, ref# 11836170001),  $\beta$ -mercaptoethanol (final concentration 5 mM), 250 U benzonase per 100 mL culture volume) to a final concentration of 5-10 g/mL. The cells were lysed with a French press at 1.5 kbar and the flow-through was centrifuged at 15000 g (30 min, 4°C) to separate soluble and insoluble components. The soluble-fraction was purified using nickel-affinity chromatography using a fast protein liquid chromatography (FPLC) system (Äkta Start Purification System, The Netherlands). The soluble-fraction was loaded onto a Ni-NTA Superflow cartage (Qiagen, ref # 30721) that was equilibrated with 10 CV buffer 1 (50 mM NaH<sub>2</sub>PO<sub>4</sub>, 300 mM NaCl, 10 mM imidazole, 10 % glycerol, pH 8.0). The column was washed with buffer 2 (10 CV, 50 mM NaH<sub>2</sub>PO<sub>4</sub>, 300 mM NaCl, 20 mM imidazole, 10 % glycerol, pH 8.0). Protein elution was then initiated by buffer 3 (50 mM NaH<sub>2</sub>PO<sub>4</sub>, 300 mM NaCl, 500 mM imidazole, 10 % glycerol, pH 8.0) using a 20 CV gradient (1 mL/min, 20 mL total volume), from 20 mM up to 250 mM imidazole (50% Buffer 3). All fractions were analyzed via SDS-PAGE and fractions containing >90% ovalbumin

were collected and combined. The protein was further purified by anion exchange chromatography. The combined fractions were dialyzed overnight into binding buffer (50 mM NaH<sub>2</sub>PO<sub>4</sub>, pH 8.0) and loaded onto an anion exchange column (GE Healthcare-HiTrap Q HP, ref# 17-1153-01) that had been equilibrated with 10 CV binding buffer. The protein was eluted using an elution buffer gradient (50 mM NaH<sub>2</sub>PO<sub>4</sub>, 0-500 mM NaCl, pH 8.0). Elution fractions were analyzed by SDS-PAGE and the fractions containing the POI were combined and dialyzed o.n. into 10-100 mM NaHCO<sub>3</sub>, pH 8.0 to yield 2 mL of a 2-5 mg/mL solution of wt-Ova (yield 0.4-2 mg/L culture). The protein solution was snap-frozen and stored at -80°C until further use.

### ***Expression of bioorthogonal Ova variants***

Bioorthogonal protein expression was performed as described for the wt-Ova protein with the following changes. After reaching the optimal optical density of 0.6-0.9 for the pre-culture, the medium was exchanged for the SelenoMet methionine deficient medium and the culture was left to grow for another 30 min at 37°C. Then the medium was supplemented with unnatural amino acid, namely, Aha (0.4 mM) or D/L-Hpg (0.8 mM) and expression was induced by addition of 1 mM IPTG. Expression was continued o.n. (30°C, 180 rpm). The culture was harvested by centrifugation (30 min, 4 °C and 4000 g). The cells were lysed as above and purified as described for wt-Ova.

## **Enzymatic and Chemical Modification of Recombinant Proteins**

### ***In vitro Carbamylation of recombinant proteins***

Vin variants were carbamylated using a protocol adapted from Fando *et al.*<sup>8</sup>. Briefly, the POI (2 mg/mL) was reacted with 0.2 M potassium cyanate (KOCN) in H<sub>2</sub>O in a 1:1 v/v ratio for 24 h at 37°C. Typical reaction volumes were 0.5-1.0 mL. The reaction progress was analyzed by LC-MS (Waters UPLC). Upon completion of the reaction, carbamylated proteins were purified by gel filtration over Sephadex G-25 (PD-10 prepacked column, GE Healthcare). Purified proteins were stored at -80°C until further use.

### ***In vitro Citrullination of Recombinant Proteins***

Recombinant Vin variants were citrullinated as follows; 1 mg/mL of POI was dissolved in Tris-HCl (100 mM, pH 7.6) buffer containing CaCl<sub>2</sub> in ddH<sub>2</sub>O (10 mM) and DTT (5 mM). Recombinant PAD4 (Sigma Aldrich, final concentration 1U) was added to the reaction mixture. Samples were incubated at 37°C for 5 h-o.n. under constant shaking (400 rpm). Upon completion of the reaction, citrullinated protein samples were purified via gel filtration and stored at -80°C for further use.

## **Degradation assays**

### ***Protein degradation in vitro using lysosomes***

For magnetic lysosomal extraction, the protocol described by Walker and Lloyd-Evans with several modifications was used.<sup>9</sup> Briefly, 20\*10<sup>6</sup> RAW macrophages were pulsed for 24 h at 37°C with 10% dextran coated magnetite (DexoMAG 40, Liquids Research Ltd) nanoparticles. After rinsing with PBS, cells were incubated with complete DMEM for another 24 h. At the end of this chase period, the cells were rinsed and harvested in PBS, centrifuged (200 g, 5 min), and homogenized with buffer 1 (15 mM KCl, 1.5 mM MgCl<sub>2</sub>, 10 mM HEPES) using a dounce homogenizer with 30 cycles. Following homogenization, buffer 2 (200 mM HEPES pH 7.2, 0.1 mM sucrose, 375 mM KCl, 22.5 mM MgCl<sub>2</sub> and 25 µL Benzonase in 5 mL) was added to the cells. Subsequently, cells were centrifuged at 200 g for 10 min and the supernatant was loaded on a buffer 1 equilibrated LS column (Miltenyi Biotec, Auburn, CA) placed inside a strong magnetic field (QuadroMACS Separator). Note that following steps were conducted at 4 °C. The non-magnetic fraction was collected through washing the column with cold buffer 1 (2x 5 mL). Next the LS column was washed with 1 mL of PBS with 0.1 mM sucrose and Benzonase (25 U) to detach nuclear fractions. Thereafter, the LS column was washed with 1 mL of PBS containing 0.1 mM sucrose and separated from the magnetic field to elute the magnetically labeled lysosomes with 0.5-1 mL of PBS and 0.1 mM sucrose buffer. For long term storage, the lysosomes are snap-frozen in liquid N<sub>2</sub> and could be stored up to 3 months at -80 °C without loss of proteolytical activity.

In a typical degradation experiment, lysosomes were subjected to multiple rapid (subsequent 4-5 times) freeze and thaw cycles to lyse them. Prior to use, the protein concentration was determined using the Bradford or Qubit protein assay. Approximately 18 µg of lysosomal proteins were used for each reaction condition. Recombinant or purchased proteins were diluted to a final concentration of 15 µM in a total reaction volume of 200 µL. Reaction mixtures were acidified with 0.4 µL 5 M HCl to pH 5.0 and samples were taken after 0, 15, 30 min as well as 1, 2, 4, 18, 22 and 48 h. Collected samples were analyzed via SDS-PAGE and the specific protein amount was visualized by Coomassie staining.

### ***MS analysis of protein degradation in vitro using Cathepsin S***

Human recombinant Cathepsin S (R&D systems) was diluted in assay buffer (50 mM NaOAc pH 4.5, 250 mM NaCl, 5 mM DTT) to 10 µg/ml and activated by incubation for 2 hours (RT, 400 rpm). 200 pmol per Vin variant (n=3) was diluted in assay buffer and 0.2 pmol activated CatS was added (1:1000 molar ratio catS:Vinculin) in a total volume of 20 µL and incubated for 1 hour at 400 rpm. Samples were incubated at 90°C for 15 min and free thiols were alkylated with iodoacetamide (12 mM final) for 30 min at RT in the dark. Samples were acidified (pH 2-3) with formic acid and desalted over StageTips. Peptides were dried by SpeedVac (2 hours at 45°C) and reconstituted in 100 µL 97:3:0.1 solution (H<sub>2</sub>O, ACN, FA).

The desalted peptides solution was separated on a UltiMate 3000 RSLCnano system set in a trap-elute configuration with a nanoEase M/Z Symmetry C18 100Å, 5µm, 180µm x 20 mm (Waters) trap column for peptide loading/retention and nanoEase M/Z HSS C18 T3 100Å, 1.8µm, 75 µm x 250 mm (Waters) analytical column for peptide separation. The column was kept at 40°C in a column oven. Flow gradient used for analysis was a steep (45 min) gradient of mobile phase A (0.1% formic acid (FA) in ULC-MS grade water (Biosolve)) and mobile phase B (0.1% FA in ULC-MS grade acetonitrile (ACN, Biosolve)) controlled by a flow sensor at 0.3µl/min with average pressure of 400-500 bar (5500-7000 psi). Samples were injected (5 µL) on the trap column at a flow rate of 15 µl/min for 9 min with 99%A, 1%B eluent. The gradient was programmed with linear increment to 1% B from t0 to t2 min, 10%B to t5 min, 30%B at t25, 90%B at t26 to t33 and 1%B at t34 to t45 min. The eluent was introduced by electro-spray ionization (ESI) via the nanoESI source (Thermo) using stainless steel Nano-bore emitters (40 mm, OD 1/32", ES542, Thermo Scientific). The QExactive HF was operated in positive mode with data dependent acquisition without the use of lock mass, default charge of 2+ and external calibration with LTQ Velos ESI positive ion calibration solution (88323, Pierce, Thermo) every 3-5 days to less than 2 ppm. The tune file for the survey scan was set to scan range of 350 – 1400 m/z, 60,000 resolution, 1 microscan, automatic gain control (AGC) of 1e6, max injection time of 50 ms, no sheath, aux or sweep gas, spray voltage ranging from 1.7 to 3.0 kV, capillary temp of 250°C and a S-lens value of 80. The sensitive MS method settings were: the survey scan was taken at 120,000 resolution, AGC target of 3e6, maximum IT time of 100 ms, and scan range of 350 to 1400 m/z. For the 10 data dependent MS/MS events the loop count was set to 10 and the general settings were resolution to 15,000, AGC target 1e5, max IT time 50 ms, isolation window of 1.6 m/z, fixed first mass of 120 m/z and normalized collision energy (NCE) of 28 eV. For individual peaks the data dependent settings were 1.00e3 for the minimum AGC target yielding an intensity threshold of 2.0e4 that needs to be reached prior of triggering an MS/MS event. No apex trigger was used, unassigned, +1 and charges >+8 were excluded with peptide match mode preferred, isotope exclusion on and dynamic exclusion of 10 sec. In between experiment samples routine wash and control runs were done by injecting 5 µl 97.3.0.1 solution, 5 µl of 10 fmol/µl BSA or enolase digest and 1 µl of 10 fmol/µl angiotensin III (Fluka, Thermo)/oxytocin (Merck) to check the performance of the platform on each component (nano-LC, the mass spectrometer (mass calibration/quality of ion selection and fragmentation) and the search engine).

Resulting MS RAW. files were analyzed by using PEAKS software 10.0 (Bioinformatic Solutions Inc.) and PEAKSDB search with a focused UniProt identifier database consisting of human Vinculin<sub>435-742</sub>, his-tag Vinculin<sub>435-742</sub>, BSA, yeast enolase, trypsin, avidin, and streptavidin was performed. Error tolerance was set to 10 ppm for the parent mass and 0.2 Da for fragmented ions. Enzyme specificity was set as 'none' and 30 PTMs per peptide were allowed. Carbamidomethylation (+57.02) was set as a fixed modification and Aha replacement by Met (-4.99), Met oxidation (+15.99), citrullination (+.98) and carbamylation (+43.01) as variable modifications. The FDR was set to 0.1% and only PTMs with ion intensity >5% were considered confident. Protein coverage images were obtained by the software and peptide sequences were combined when found in at least 2/3 replicates.

### **Bioorthogonal protein degradation in cellulo**

Differentiated BMDCs or immature D1 cells were seeded in a tissue culture treated 24-well microtiter plate at  $0.2 \times 10^6$  cells/well in 250 µL medium/well and were left to attach for 3 h. The bioorthogonal antigens dissolved in IMDM complete medium were added at the indicated concentrations over 2 h pulse at 37°C, 5% CO<sub>2</sub> under humidified air. Then the medium was aspirated gently, and the cells washed with pre-warmed IMDM medium. Subsequently, cells were pulsed for the indicated times (varying from 0-48 h). The supernatant was then aspirated, and the cells resuspended in 100 µL of lysis buffer (100 mM Tris-HCl pH 7.5, 50 or 150 mM NaCl, complete protease inhibitor cocktail (EDTA-free), 0.25% CHAPS, 250 U Benzonase (Sigma, ref# E1014-25KU)) and incubated for 30 mins. The resulting samples were normalized by total protein concentration. For this purpose, the lysate was cleared via centrifugation (20000 g, 1 h) and subjected either to Bradford assay (Biorad, the Netherlands, ref# 5000001) or Qubit Protein Assay (Thermo Fisher, the Netherlands, ref# Q33211). 20 µL of the normalized lysate was then mixed with 20 µL CuAAC-buffer. This buffer was generated via addition of following chemicals in the particular order: CuSO<sub>4</sub> in Milli-Q water (100 mM stock concentration, 6.4 mM final concentration), sodium ascorbate in Milli-Q water (1 M stock concentration, 37.5 mM final concentration), followed by 2,4,6-Trimethoxybenzylidene-1,1,1-tris(hydroxymethyl) ethane methacrylate (TTMA) from a DMSO stock (100 mM, 10 µL, 1.3 mM final concentration) and HEPES (stock concentration 100 mM, final concentration 88 mM, pH 8.0). Finally, fluorophore-alkyne or -azides were added from DMSO-stocks (stock concentration 2 mM, 1-2 µL, 2.5-5 µM final concentration). Please note, upon addition of sodium ascorbate to CuSO<sub>4</sub>, a color change from blue to brown (reduction of copper(II) into copper(I)) and finally to yellow should occur. Samples were incubated for 30 minutes at r.t. under gentle agitation (100-200 rpm) in the dark prior to the addition of Laemmli-buffer and SDS-PAGE analysis after which in-gel fluorescence was measured at the respective wavelengths and the specific protein amount was visualized by Coomassie staining.

### **T-cell proliferation assays**

#### ***In vitro MHC II-restricted Antigen Presentation Assay***

BMDCs were seeded (50,000 cells/well, medium described above) in treated cell culture 96-well plates (flat bottom) and left at 37°C for 2 h to allow adhesion. Then, cells were incubated with different concentrations of wild type and bioorthogonal versions, ranging from 0.4 to 93.3 µg/mL, for 6 h. Stock solutions of proteins were prepared in 10 mM NaHCO<sub>3</sub> and DMEM complete medium. The class II epitope of OVA (T<sub>H</sub> epitope ISQAVHAAHAEINEAGR), was used as a positive control for antigen presentation. After the period of incubation, cells were washed with warm IMDM and CD4<sup>+</sup> OTII cells were added (50,000 cells/well, RPMI medium supplemented with 10% heat inactivated FCS, 2 mM glutamax, 50 µg/ml penicillin/streptomycin, 20 µM of β-mercaptoethanol). As a read out for T-cell activation, IL-2 secretion (ELISA) was measured in the supernatants 20 h later. Assays were performed in duplicates.

### ***Human T-cell activation assay (Dendritic cell and Jurkat T-cell co-culture and evaluation of Jurkat activation)***

Harvested dendritic cells were transferred to a 96-wells plate, 3 wells per condition, except for the Jurkat only conditions. When the HLA-DQ/TCR interaction was blocked with antibodies, the dendritic cells were pre-incubated for 1 hour with 20 µg/mL anti-HLA-DQ (SPVL3) and anti-HLA-DR (B8.11.2) antibodies before Jurkat T-cells were added. Upon addition of Jurkat T-cells to the wells in a 1:1 or a 1:2 ratio (even number of T-cells), the cells were cultured together for ~16-18 hours before the cells were harvested, stained with Zombie NIR Fixable viability dye (Cat#: 423105, BioLegend) according to manufacturer's protocol and fixed with 3% PFA. Cells were measured using the BD LSRFortessa. Results were analyzed using FlowJo Version 10.4.2.

### **Confocal microscopy**

Differentiated D1s were seeded in a tissue culture treated, poly-lysine coated 96-well microtiter plate at  $5 \times 10^4$  cells/well and were left to attach 3 h. Bioorthogonal antigens were diluted to a final concentration of 2 mg/mL, of which 50 µg was added to each well bearing 200 µL of cell suspension over 2 h (pulse) and were chased for 0, 2, 4 and 24 h at 37°C, 5% CO<sub>2</sub> under humidified air. Cells were washed with PBS before fixing with cold 2% PFA in PBS for 30 minutes at room temperature (r.t.) or with 0.5% PFA in PBS o.n.. After fixation, cells were again washed with PBS, then with the quenching buffer (20 mM glycine in PBS) and permeabilized with staining buffer (0.1% IGEPAL, 1% BSA in PBS) for 20 minutes at room temperature. After washing with PBS and subsequently with 100 mM HEPES (pH 8), bioorthogonal antigens were incubated 1 h with click mix (1 mM CuSO<sub>4</sub>, 10 mM sodium ascorbate, 1 mM THPTA ligand, 10 mM aminoguanidine, 100 mM HEPES pH 8 and 5 µM Alexa Fluor 647-azide or alkyne. Upon CuAAC, cells were washed first with 100 mM HEPES (pH 8), then with PBS, then incubated for 30 minutes with 1% BSA in PBS and stained with Alexa Fluor® 488 LAMP-1 antibody (Biolegend, clone 1D4B, Cat#:121608, 1:200 dilution, staining in 1% BSA, 0.1% tween-20 in PBS) for 1h. Cells were washed three times with PBS before addition of fluoroshield mounting medium containing DAPI (Cat#: ab104139) and samples were imaged with a Leica SP (63x oil lens, N.A.=1.4) or Andor Dragonfly confocal microscope.

### **Molecular docking**

Molecular docking was performed using ICM Molsoft Chemist Pro, version 3.8-7c. The sequence of HLA-DQA1\*03:01/DQB1\*03:02 (HLA-DQ8) was retrieved from the IPD-IMGT/HLA Database<sup>10</sup> and used as a BLAST query against the deposited sequences of the Protein Data Bank using ICM Molsoft's inbuilt feature. Of the eight entries with >95% similarity 6DFX<sup>11</sup> was selected. Of this structure chains A and B were converted to an ICM object, with 'optimize hydrogens' set to true. All water was removed. The bound 19-mer epitope was isolated to a separate object and trimmed to 15 amino acids in length (VEELYLVAGEEGCGG). This 15-mer was set up as ligand in Molsoft's Ligand Editor, and the 6DFX object was selected as receptor. A pocket box was defined around the existing ligand using default settings. The epitope was tethered at 4 positions: the N-terminal amine, the carboxylate of E3, the carbonyl of L4 and the N of G12. The ligand was then manually edited to the Vin-DERAA epitope (REEVFDERAANFENH). This was then redocked in the receptor using all default settings. The same was done for Cit<sub>2</sub>-Vin-DERAA. The 10 best poses were kept for each epitope and visually inspected. The RMSD of the top ranking poses was calculated compared to the PDB included epitope, determined based on backbone heavy atoms. For the Vin-DERAA epitope this was found to be 1.843 Å, for the Cit<sub>2</sub>-Vin-DERAA 2.893 Å. The final Figure was visualised using the Open Source PyMOL application.

### **Analytical methods**

#### ***SDS-PAGE analysis***<sup>12</sup>

For SDS-PAGE analysis all samples were heated for 5 minutes at 95°C (exception: samples containing click cocktail). 20 µL of each sample was loaded onto a 15% SDS-PAGE gel (0.75 or 1.5 mm) and run for ~70 min at constant 170 V. Subsequently in-gel fluorescence was measured at indicated wavelength filters for Alexa 488, Alexa 647 or Cy5, after which a Coomassie staining was performed. For imaging the gels, Biorad Chemidoc Imager and ImageLab 5.2 software (Biorad) was used.

#### ***NATIVE PAGE analysis***

Native PAGE was performed as described by Arndt *et al.*<sup>13</sup>. Images were taken via Chemidoc Imager and were analyzed via ImageLab 5.2 software (Biorad).

#### ***Circular Dichroism (CD)***

All recombinant wt and bioorthogonal Vin and Ova variants were characterized via CD spectroscopy. Far UV-CD spectra were recorded using a Jasco J815 CD spectrometer equipped with a Jasco PTC 123 Peltier temperature controller (Easton, MD) between 190-260 nm. A minimum of five spectra with an acquisition time of 70 seconds (s) for each scan in a 1 mm quartz cuvette at 1 nm resolution were acquired at r.t. and averaged. Typical protein concentrations were between 0.1-0.3 mg/mL.

## Organic synthesis

NMR spectra were measured on a Bruker AV-400MHz spectrometer at ambient temperature at the Leiden Institute of Chemistry NMR Facility. Chemical shifts were recorded in ppm. Residual solvent peaks were used as an internal standard.

### ***SYNTHESIS OF L-AZIDOHOMOALANINE (L-AHA)***

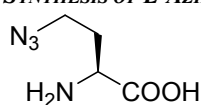

L-Aha was synthesized according to a previously described procedure<sup>14</sup>. <sup>1</sup>H-NMR (D<sub>2</sub>O), 400 MHz: δ [ppm] = 4.05 (t, 1H, α-CH), 3.55 (t, 2H, γ-CH<sub>2</sub>), 2.15 (m, 2H, β-CH<sub>2</sub>).

### ***SYNTHESIS OF D,L-HOMOPROPARGYLGLYCINE (D,L-HPG)***

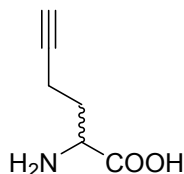

D,L-Hpg was synthesized according to previously described procedure<sup>15</sup>. <sup>1</sup>H-NMR (D<sub>2</sub>O), 400 MHz: δ [ppm] = 4.12 (t, 1H, α-CH), 2.3-2.12 (m, 1H), 2.11-2.0 (m, 1H).

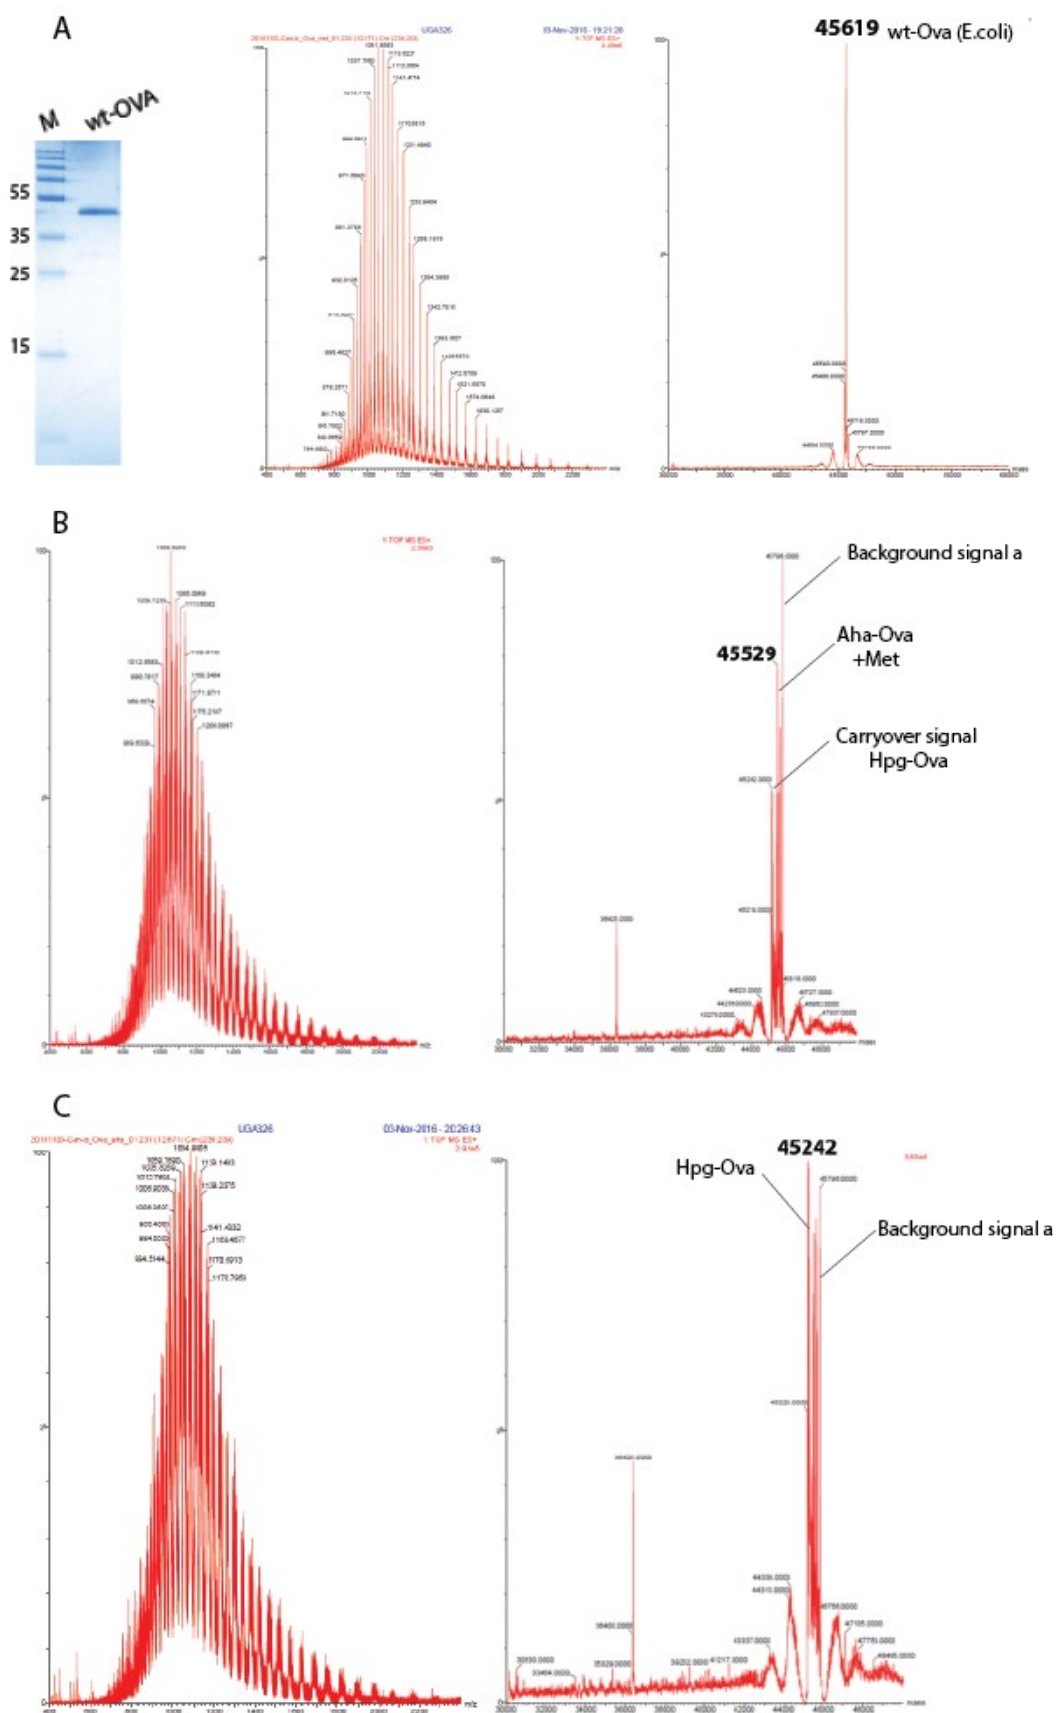

**Figure S1: Characterization of wt and bioorthogonal Ova derivatives.** A: left panel; SDS-PAGE analysis of wt-Ova (lane 2), right panel; TOF-MS analysis of wt-OVA (expected mass: 45618.7 Da, observed mass: 45619 Da), B: TOF-MS analysis of Aha-Ova (expected mass: 45534, observed mass: 45529 Da), C: TOF-MS analysis of Hpg-OVA (expected mass: 45245 Da, observed mass: 45242 Da). Background signal refers to internal background noise due to low ionization energy.

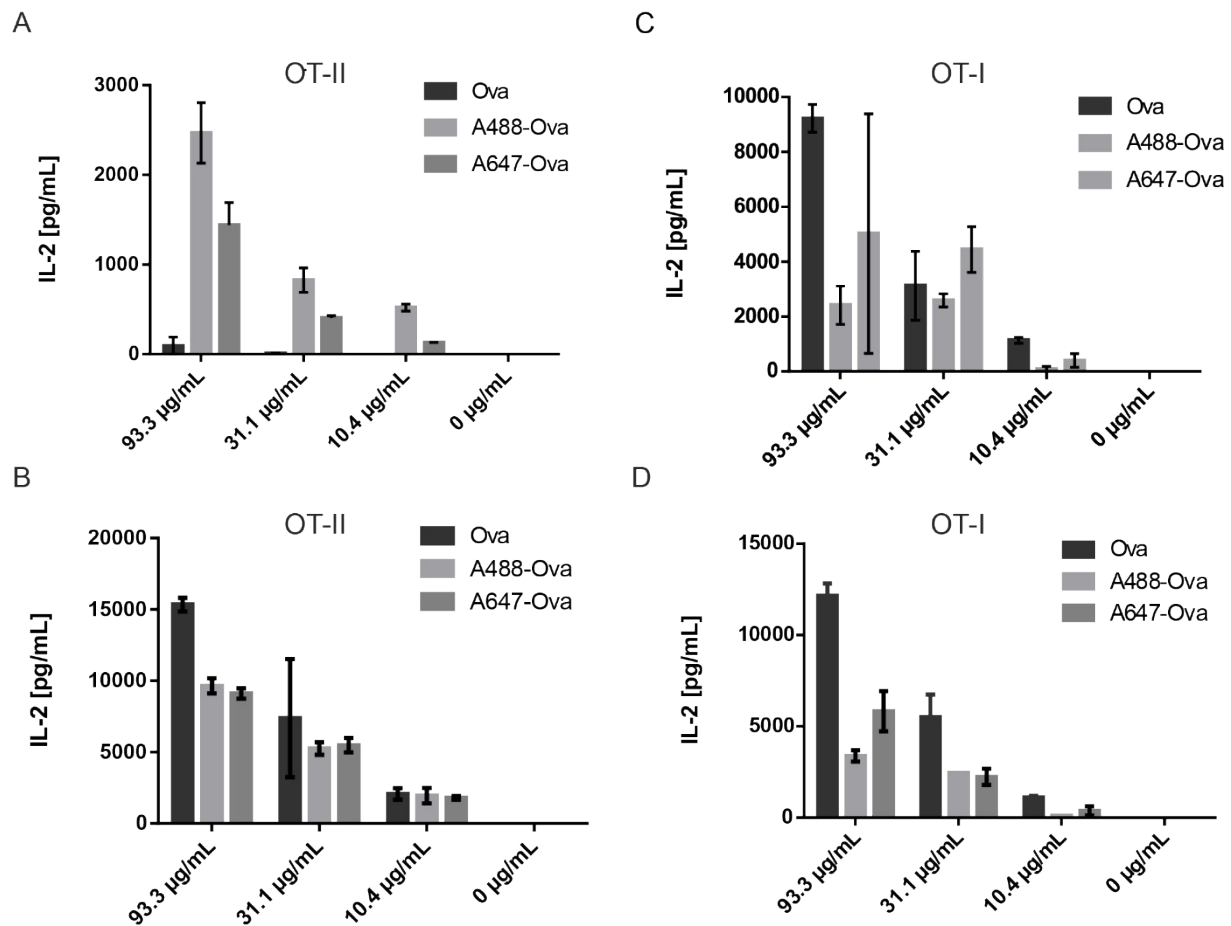

**Figure S2: Influence of fluorophore modification of Ovalbumin on the activation of antigen specific CD4<sup>+</sup>(OT-II) and CD8<sup>+</sup> (OT-I) T-cells.** A-B: ELISA (IL-2) read out for CD4<sup>+</sup> T-cell proliferation after feeding BMDCs with glycosylated commercially available Ova (Ova, dark grey) and fluorophore modified Ova (light grey, A488-Ova; grey, A647-Ova), n=1 with three technical replicates. C-D: ELISA (IL-2) read out for CD8<sup>+</sup> T-cell activation after feeding BMDCs with glycosylated commercially available Ova (Ova, dark grey) and fluorophore modified Ova (light grey, A488-Ova; grey, A647-Ova), n=3 independent with at least two experimental (N=2) replicates for B-D.

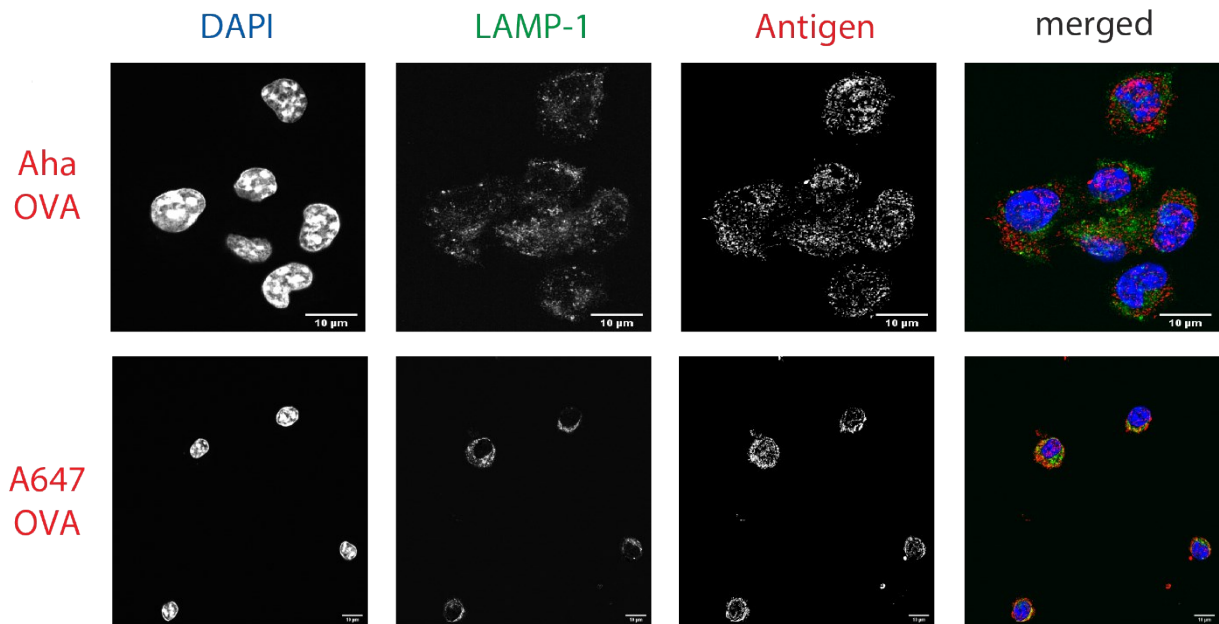

**Figure S3: Imaging processing of bioorthogonal and fluorophore-modified Ova in D1-APCs via confocal microscopy.** DCs were incubated for 2 h (pulse) with Aha or A647-Ova. Cells were fixed with 0.5% PFA and processed for immunofluorescence with the following primary antibodies. The nucleus was stained with DAPI (blue in merged images) and LAMP-1 (green in merged images) was used as a lysosomal marker. Aha-Ova was stained using copper catalyzed Huisgen cycloaddition (ccHc) with Alexa647-alkyne fluorophore (red in merged images). Upper panel: imaging of Aha-Ova, lower panel: imaging of A647-Ova. Scale bar is 10  $\mu$ m (white bar, right corner).

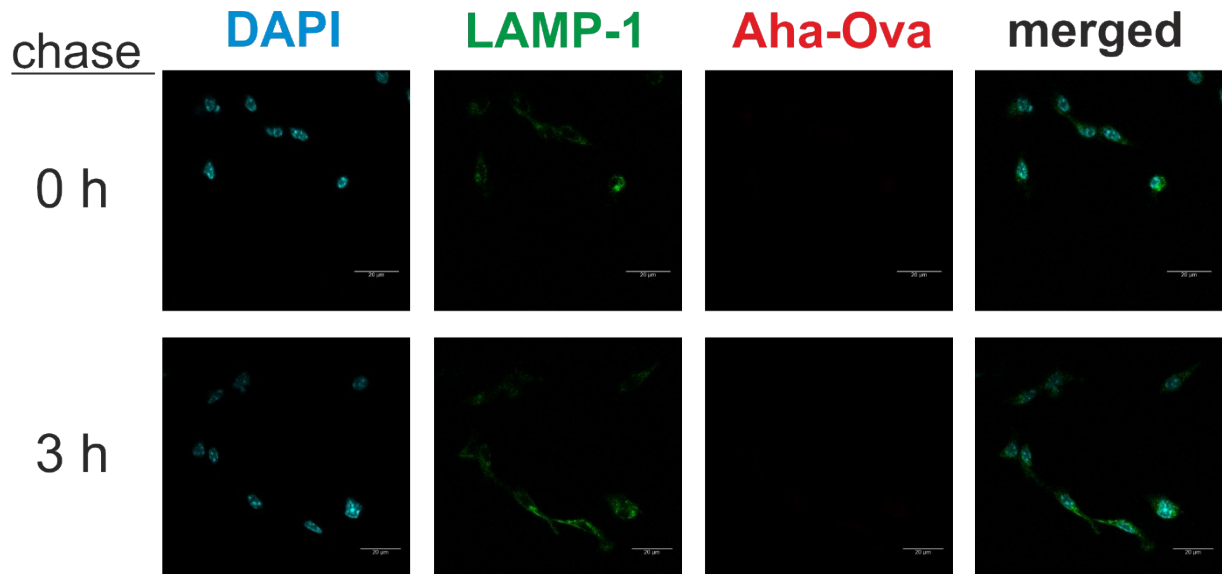

**Figure S4: Control experiment for processing of wt-Ova in D1-APCs via confocal microscopy** DCs were incubated for 2 h (pulse) with wt-Ova. Cells were chased for distinct timepoints (0 and 3 h), fixed with 2% PFA and processed for immunofluorescence. The nucleus was stained with DAPI (cyan) and anti-LAMP-1 (green) was used as a lysosomal marker. Wt-Ova was stained using ccHc with Alexa647-alkyne fluorophore (Thermo Fisher). Upper panel: Antigen uptake and processing after 0 h, lower panel: 3 h. The scale bar is 20  $\mu$ m (white bar, right corner).

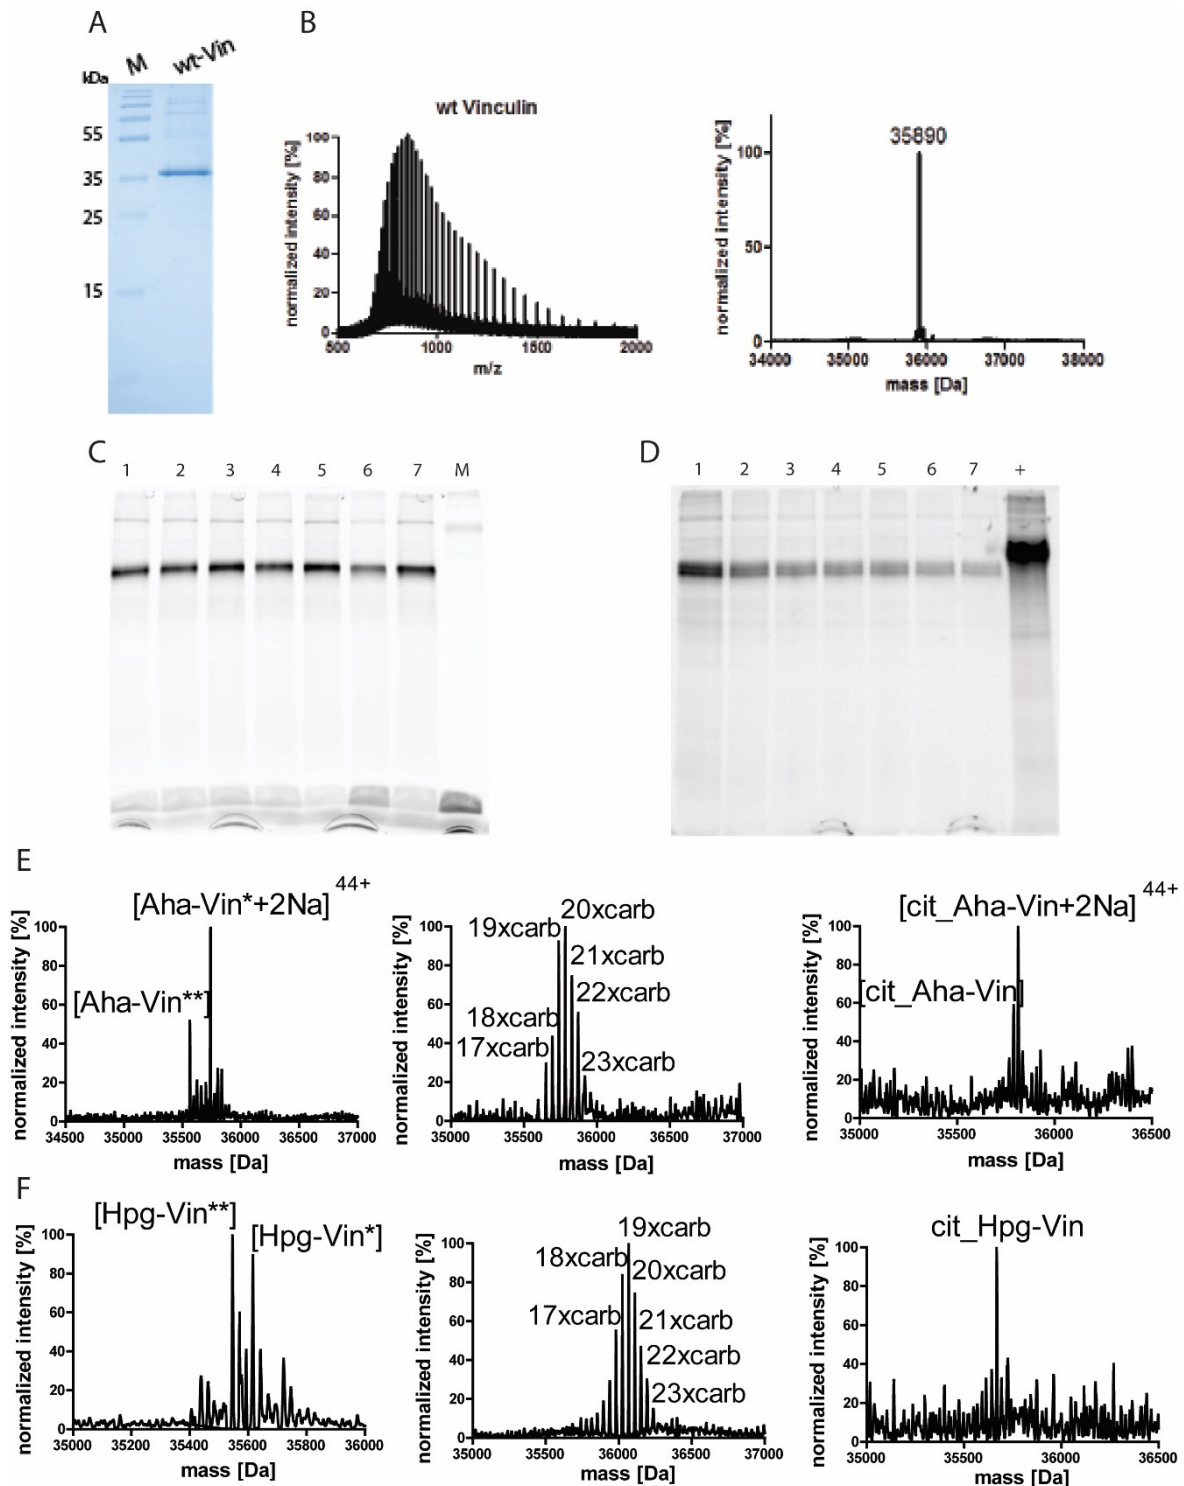

**Figure S5: Characterization of wt Vin & modified bioorthogonal Vin derivatives** A: SDS-PAGE analysis of wt Vin (lane 2), B) TOF-MS analysis of wt-Vin (expected mass: 35886 Da, observed mass: 35890 Da), C: In-gel fluorescence analysis of Aha incorporation at different ratios of fluorophore to protein concentrations, lane 1: fluorophore 1 eq: protein 1 eq., lane 2: fluorophore 1eq. : protein 3eq., lane 3: fluorophore 1eq. : protein 4eq., lane 4: fluorophore 1eq. : protein 5eq., lane 5: fluorophore 1eq. : protein 6eq., lane 6: fluorophore 1eq. : protein 7eq., lane 7: fluorophore 1eq. : protein 8eq., M: protein ladder. D: In-gel fluorescence analysis of Hpg incorporation at different ratios of fluorophore to protein concentrations, lane 1: fluorophore 1 eq.: protein 1 eq., lane 2: fluorophore 1eq. : protein 3eq., lane 3: fluorophore 1eq. : protein 4eq., lane 4: fluorophore 1eq. : protein 5eq., lane 5: fluorophore 1eq. : protein 6eq., lane 6: fluorophore 1eq. : protein 7eq., lane 7: fluorophore 1eq. : protein 8eq., +: positive control (Ova-azide). E: TOF-MS analysis of biorthogonal Aha-Vin (left, expected mass: 35715 Da, observed mass: 35714.6 for Aha-Vin\*\* & 35759 Da for [Aha-Vin\*\*+2Na]<sup>44+</sup>), and Hpg-Vin (right, expected mass: 35579 Da, observed mass: 35578.6 for Hpg-Vin\*\* & 35759 Da for [Hpg-Vin\*\*+2Na]<sup>44+</sup>). F: TOF-MS analysis of citrullinated biorthogonal Vinculin derivatives, left: citrullinated Aha-Vin (expected mass: 35734 Da, observed mass: 35736 Da), right: citrullinated Hpg-Vin (expected mass: 35669 Da, observed mass: 35668 Da).

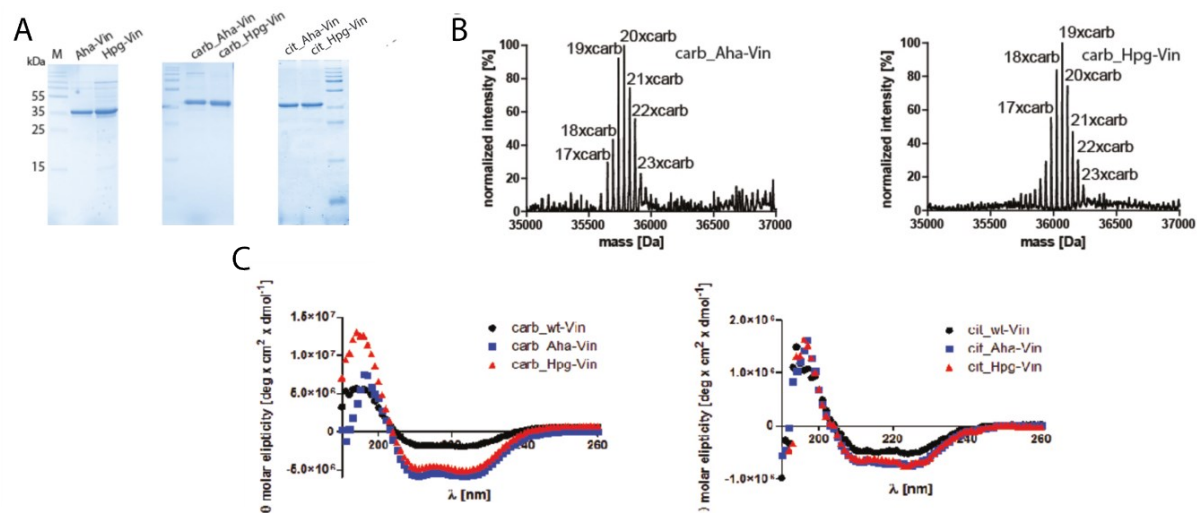

**Figure S6: Carbamylation and citrullination of (bioorthogonal) Vinculin.** A: SDS-PAGE analysis of purified, non-modified (left), carbamylated (middle) or citrullinated (right) bioorthogonal Vin derivatives. B: TOF-MS analysis of carbamylated bioorthogonal Vin derivatives, left; carb\_Aha-Vin (mixed species from 17x-to 23x-carbamylated Aha-Vin, no traces of non-carbamylated Aha-Vin), right; carb\_Hpg-Vin (mixed species from 17x-to 23x-carbamylated Hpg-Vin, no traces of non-carbamylated Hpg-Vin) C: Biophysical characterization of modified bioorthogonal Vin via circular dichroism (CD) spectroscopy, left panel: carbamylated Vin derivatives, right panel: citrullinated Vin derivatives. wt- (black circles), Aha- (blue squares) and Hpg-Vin (red triangles)

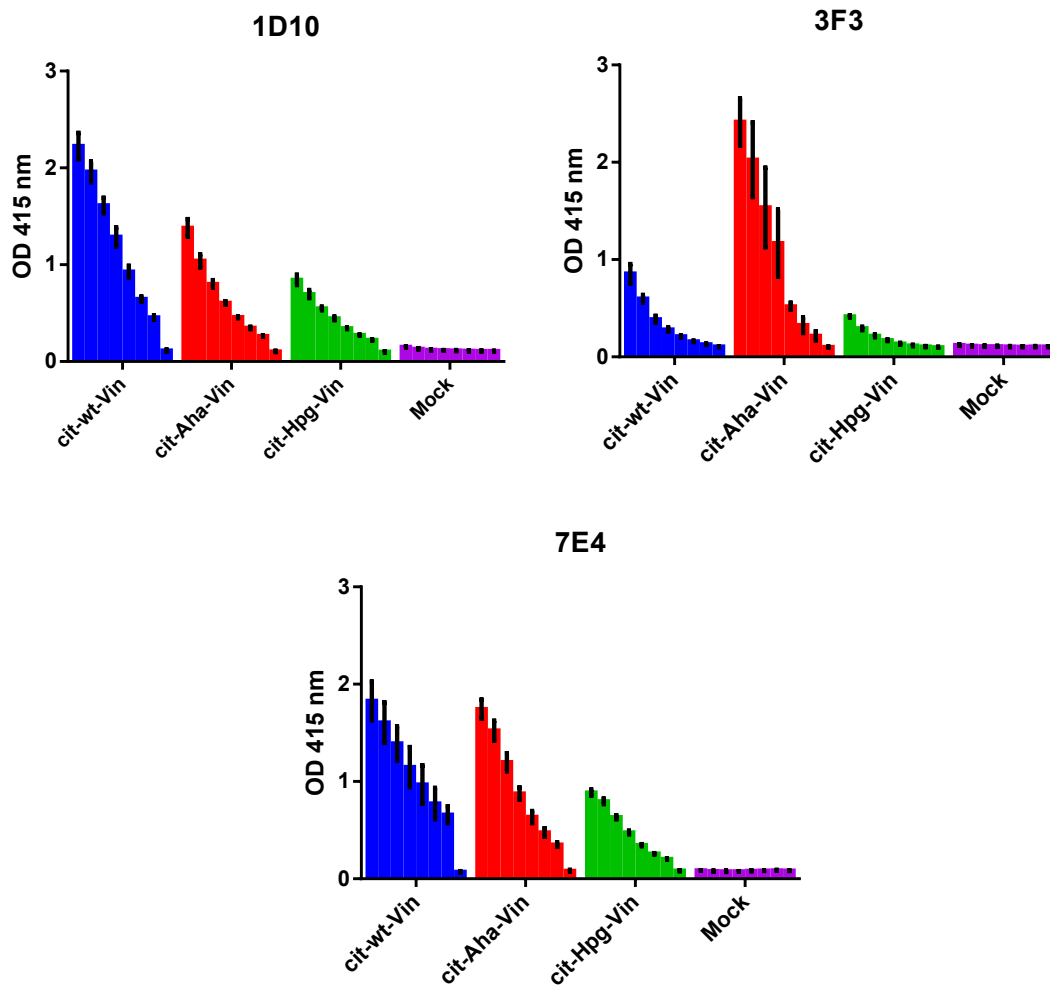

**Figure S7: ACPA binding assay via qualitative ELISA.** The grey triangles represent drop of concentration within the experiments. Concentrations between 20, 10, 5, 2.5, 1.25, 0.63, 0.31 and 0  $\mu$ M were used.

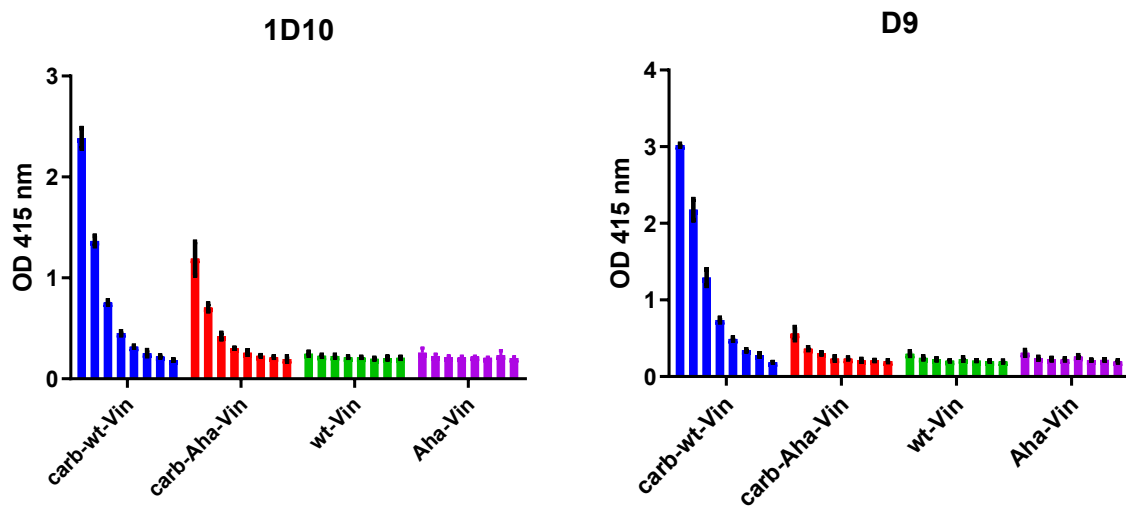

**Figure S8: ACarPA binding assay via qualitative ELISA.** The grey triangles represent drop of concentration within the experiments. Concentrations between 20, 10, 5, 2.5, 1.25, 0.63, 0.31 and 0  $\mu$ M were used.

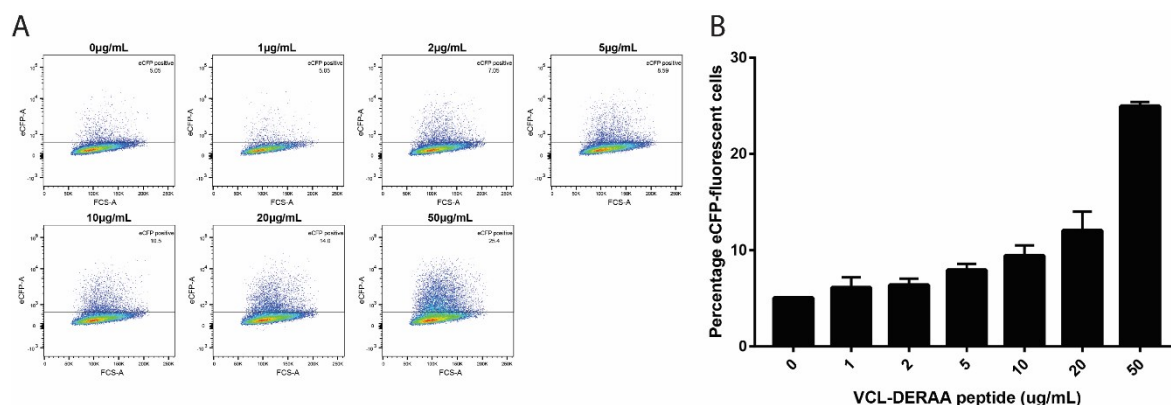

**Figure S9: T-cell activation of Jurkat-DECAA cells with titrated amounts of VCL-DECAA peptide.** The T-cells were stimulated by HLA-DQA1\*03:01/DQB1\*03:02+ (HLA-DQ8+) EBV-transformed B cells presenting VCL-DECAA peptide with titrated amounts (0-50 µg/mL). The TCR on Jurkat-DECAA recognizes VCL-DECAA peptide in a dose-dependent manner. A: eCFP positivity in FACS was used as readout, B: Plotted data in bar graphs, data is shown as n=2 with biological triplicates. Error bars are presented as ±SD.

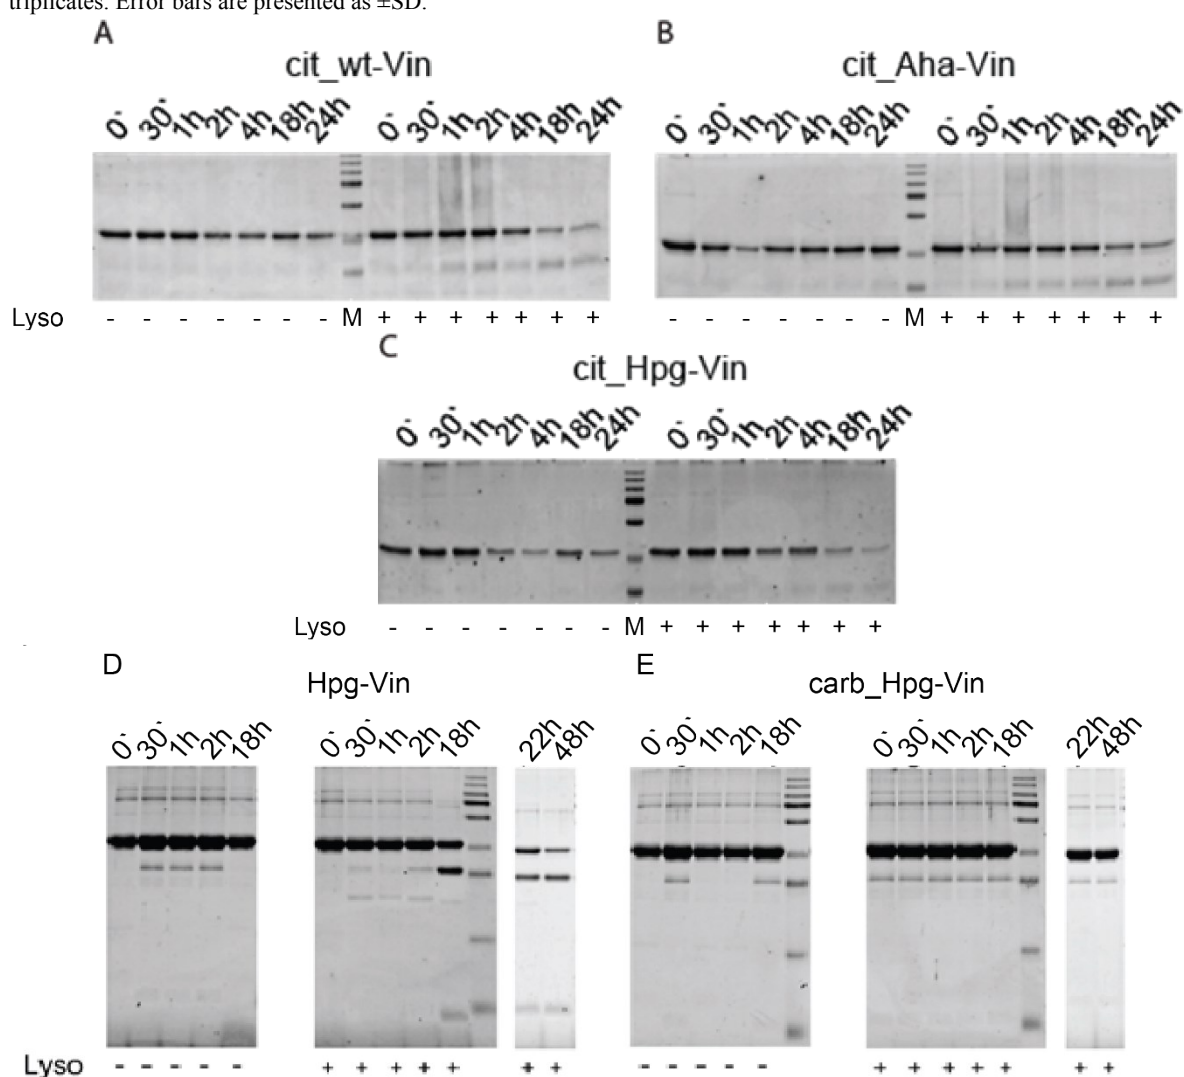

**Figure S10: Proteolysis citrullinated Vin, carb-Hpg-Vin and wt-OVA in vitro** A) Cit-wt-Vin incubated with lysosomes extracts (Lyso +) for 0h, 30min, 1h, 2h, 3h, 18h and 24h. B) Cit-Aha-Vin incubated with lysosomes extracts for 0h, 30min, 1h, 2h, 3h, 18h and 24h. (Lyso -) : samples not incubated with lysosomes (control samples) C) Cit-Hpg-Vin incubated with lysosomes extracts for 0h, 30min, 1h, 2h, 4h, 18h and 24h. D) Carb-Aha-Vin incubated with lysosomes extracts for 0h, 30 min, 1h, 2h and 18h. Left; Hpg-Vin without lysosomes (control samples), right; Hpg-Vin incubated with lysosomes. E) Carb-Hpg-Vin incubated with lysosomes extracts for 0h, 30 min, 1h, 2h and 18h. Left; Carb-Hpg-Vin without lysosomes (control samples), right; Carb-Hpg-Vin incubated with lysosomes. For all lanes on A-C a total amount of 2.5 µg protein was loaded. Total amount of protein/lane on D-E is 5 µg.

wt-Vin 1 (73%, 81 peptides)

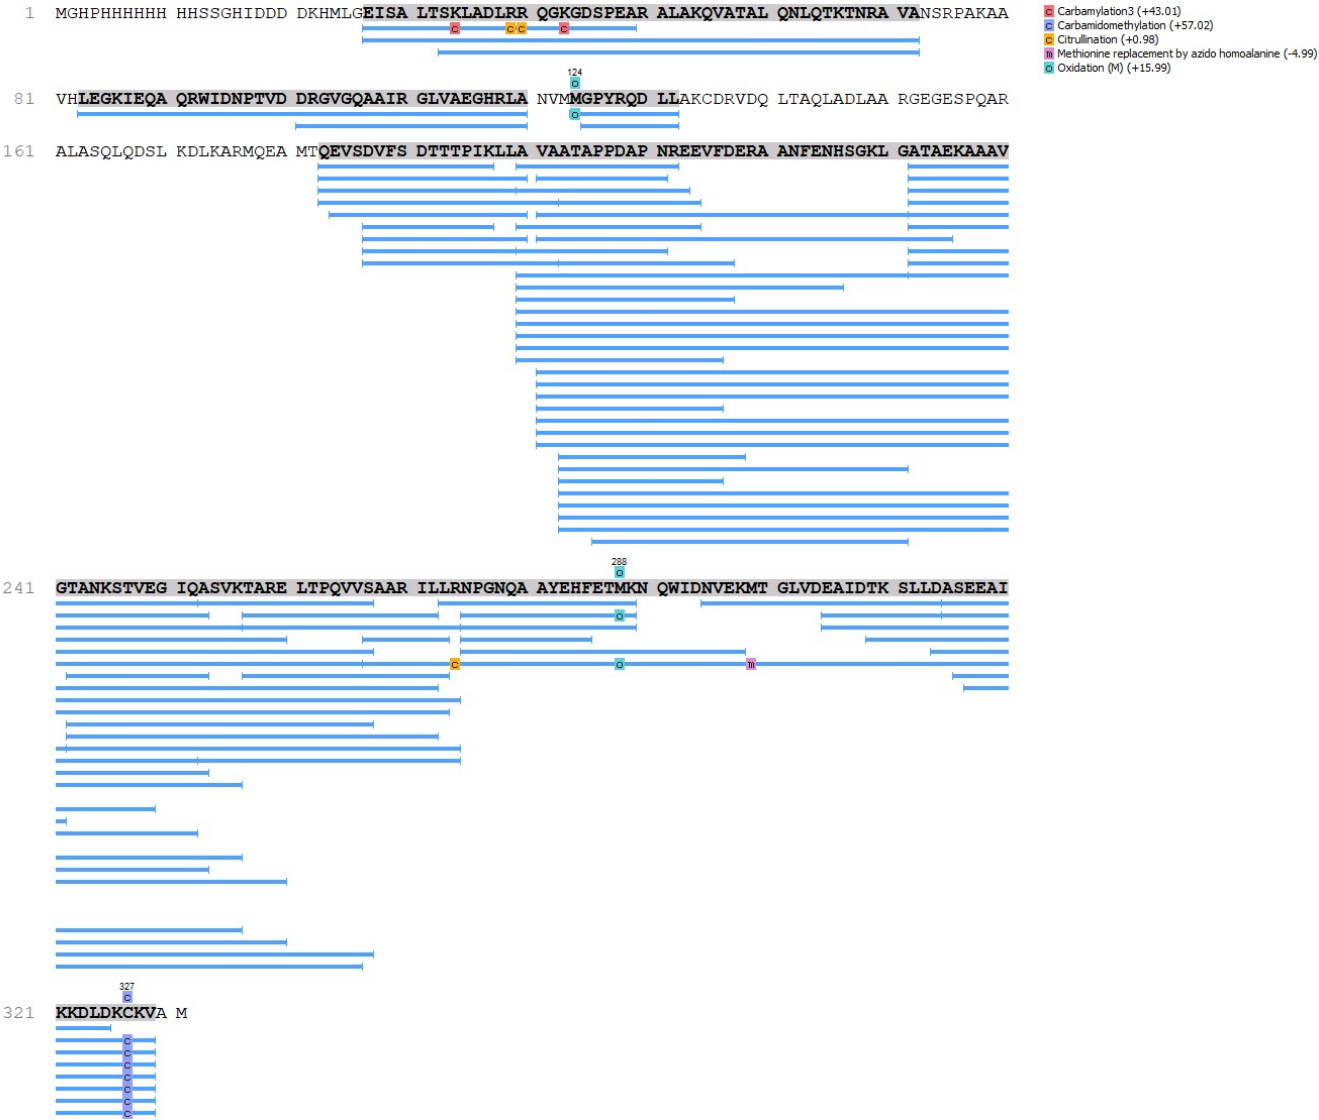

wt-vin 2 (81%, 108 peptides)

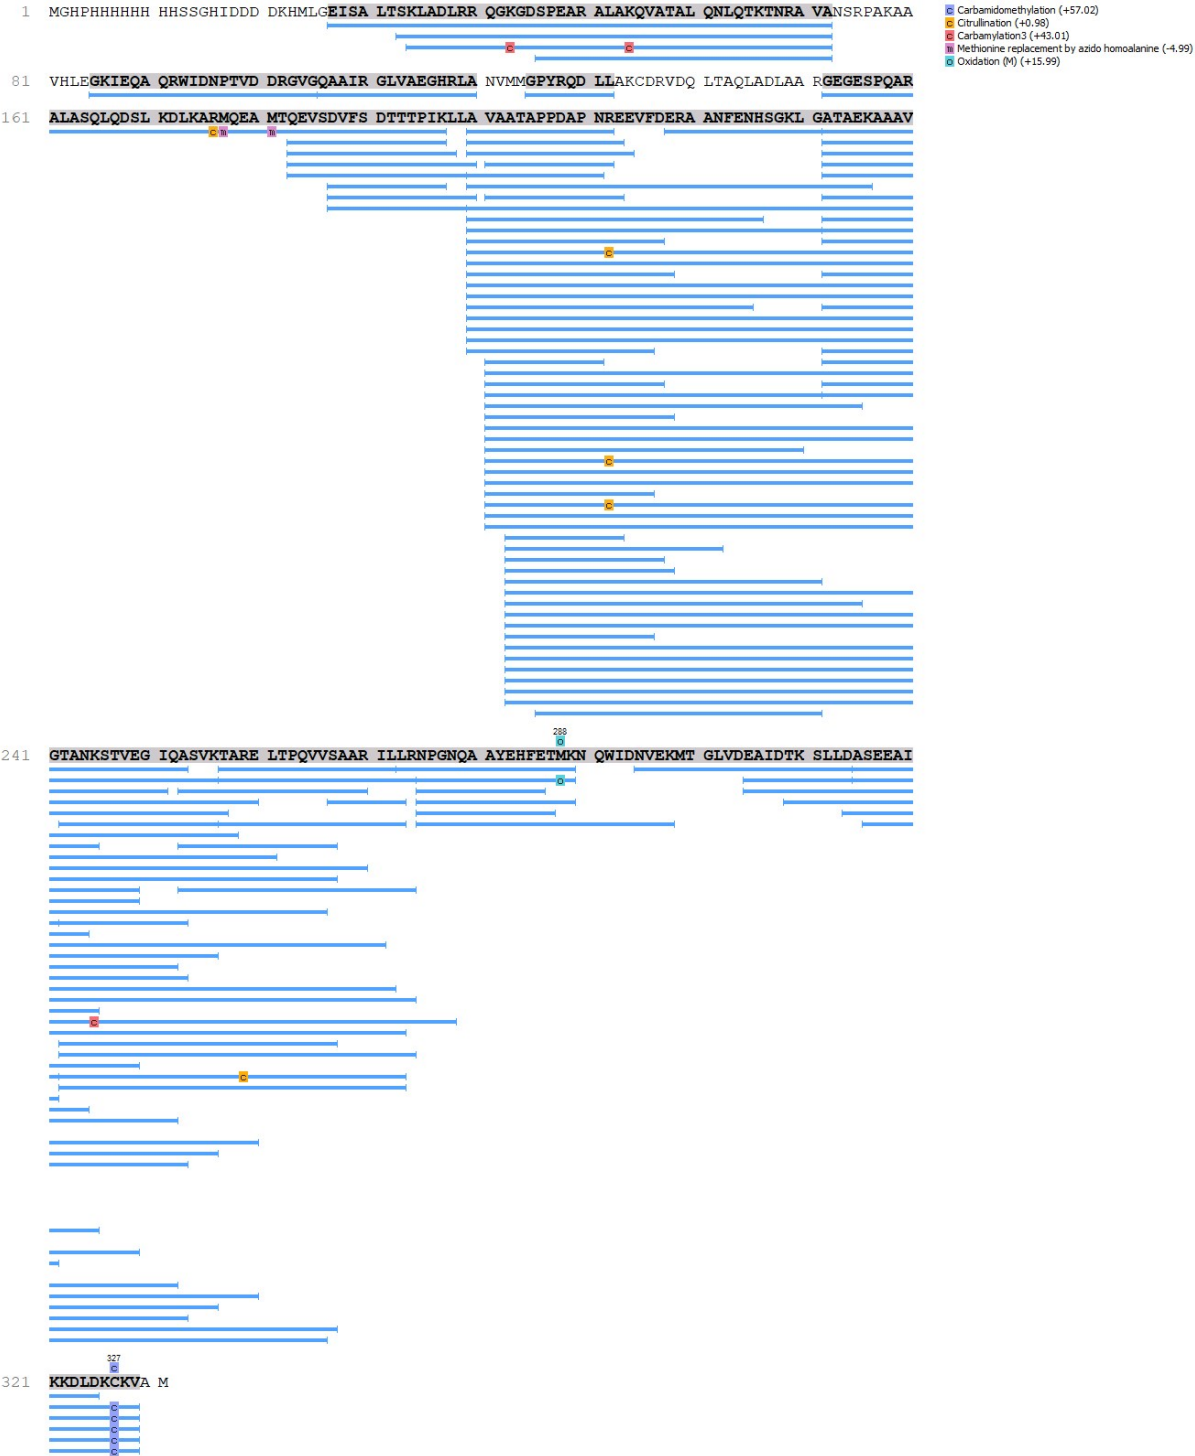

wt-Vin 3 (77%, 119 peptides)

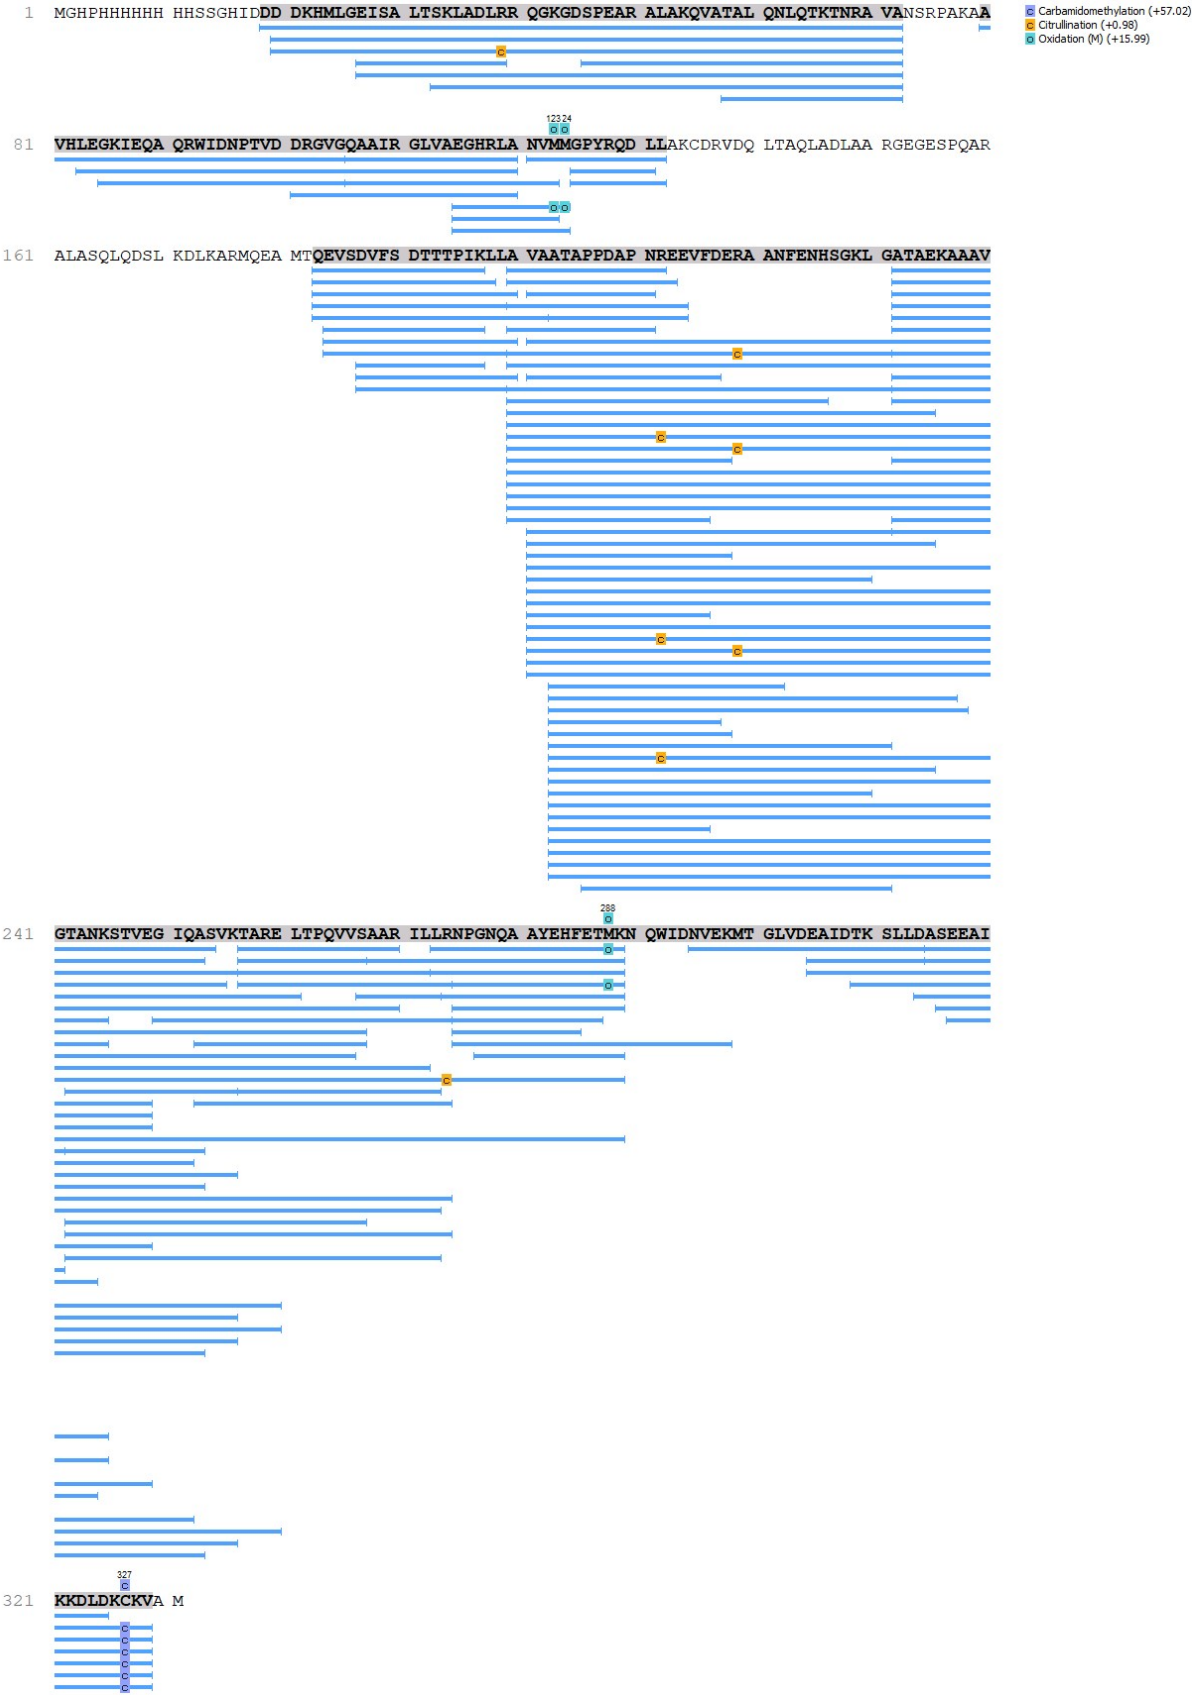

Aha-Vin 1 (74%, 76 peptides)

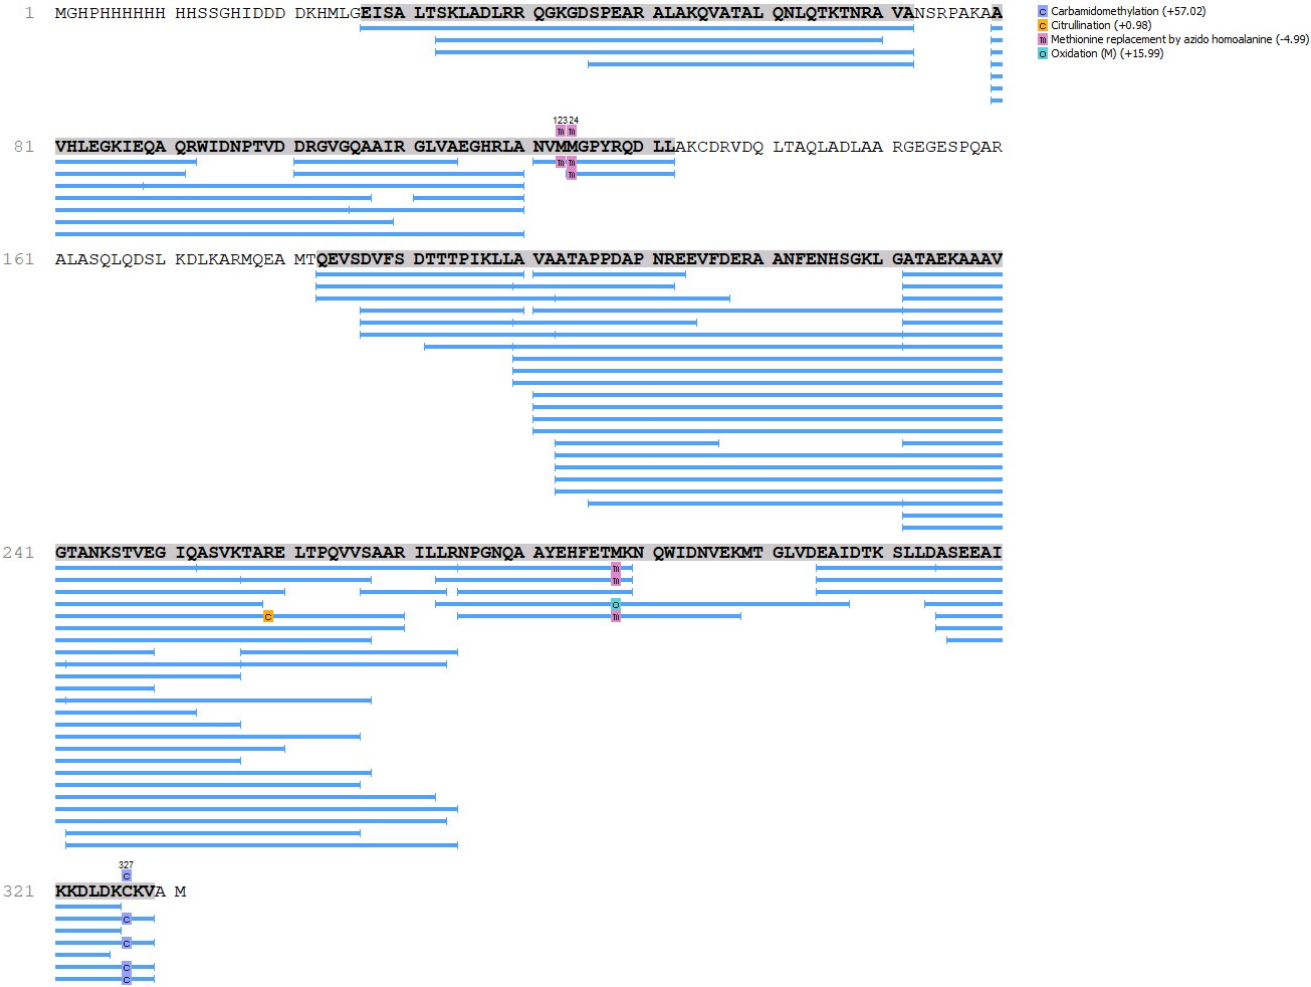

Aha-Vin 2 (76%, 81 peptides)

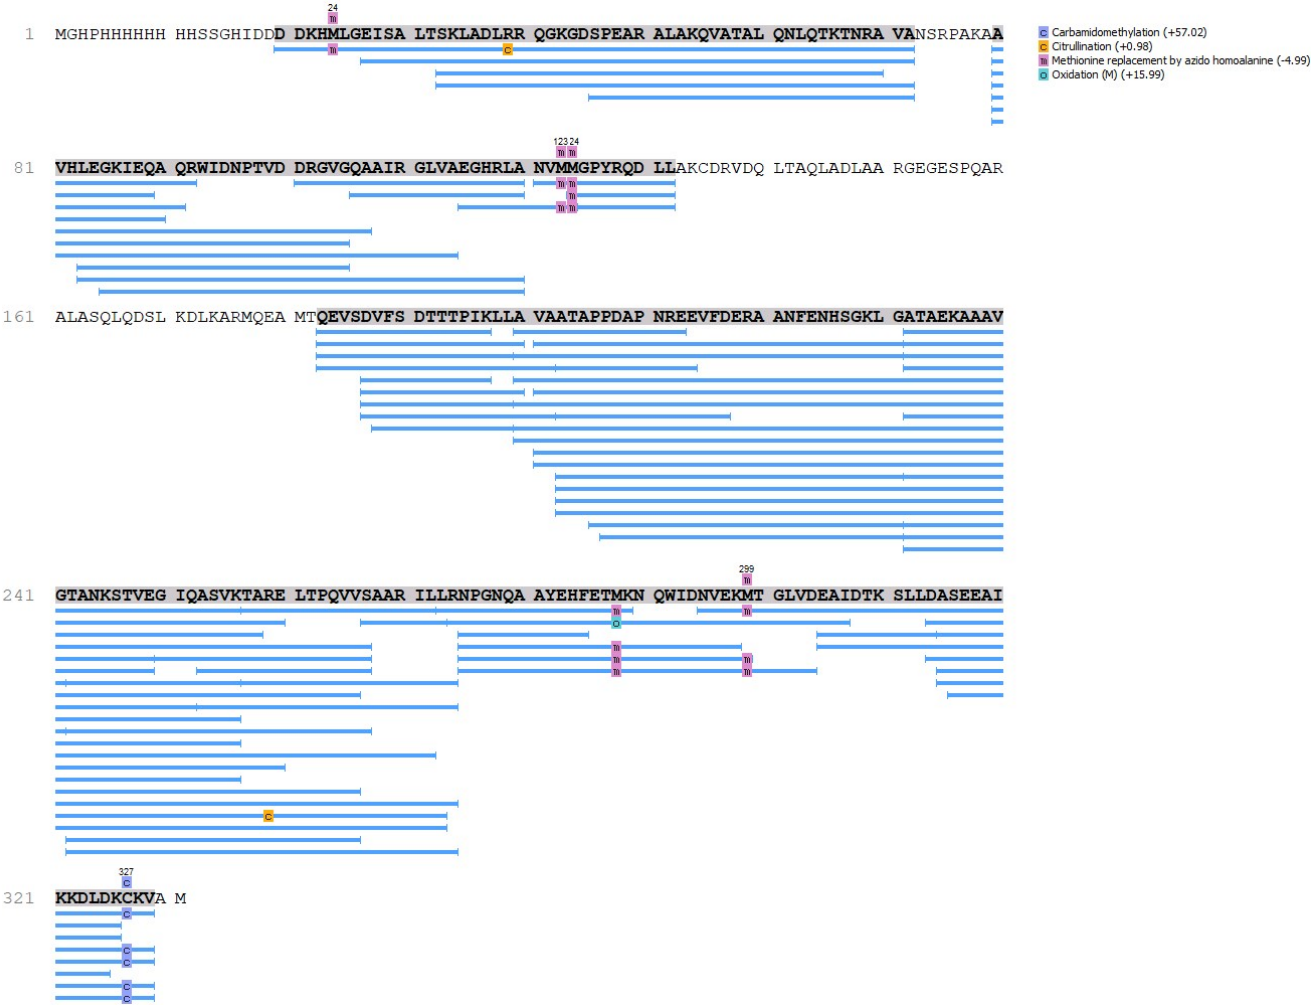

Aha-Vin 3 (75%, 74 peptides)

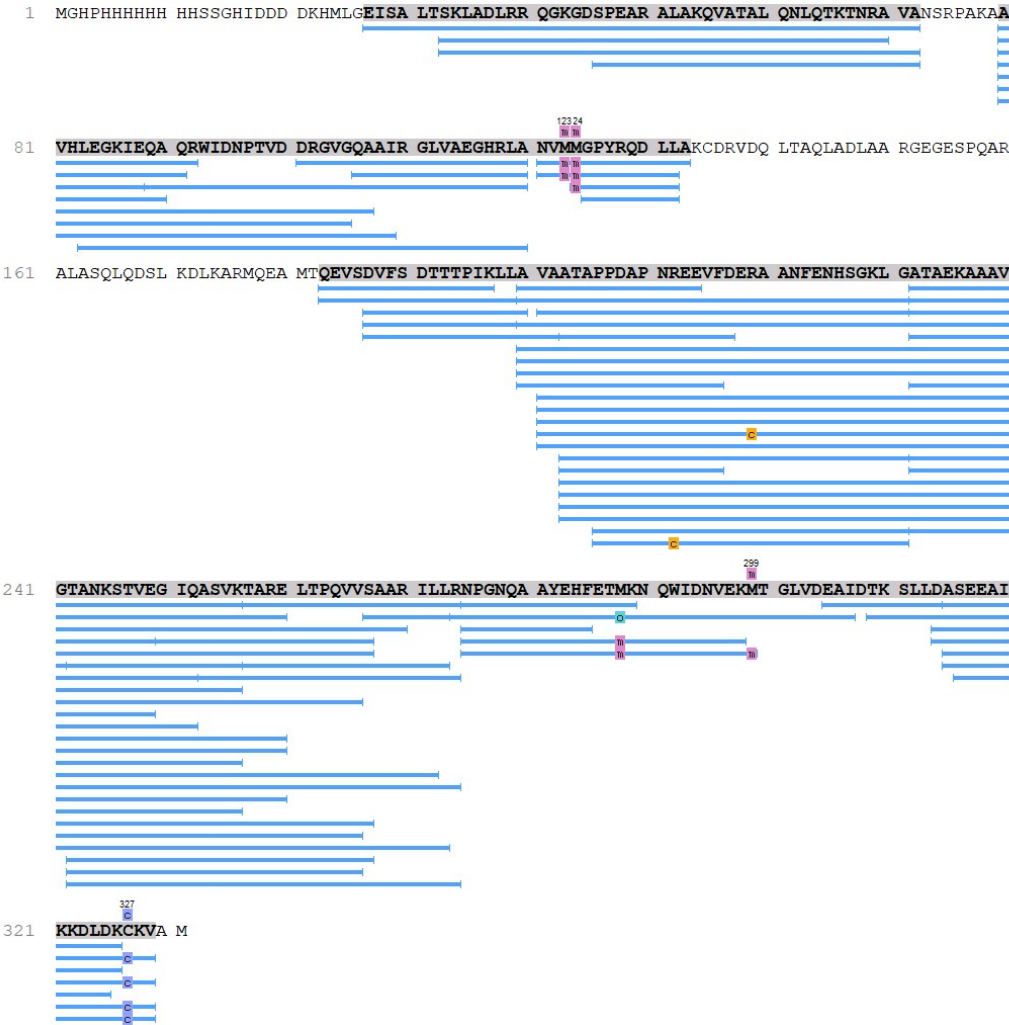

# Cit-wt-Vin 1(53%, 60 peptides)

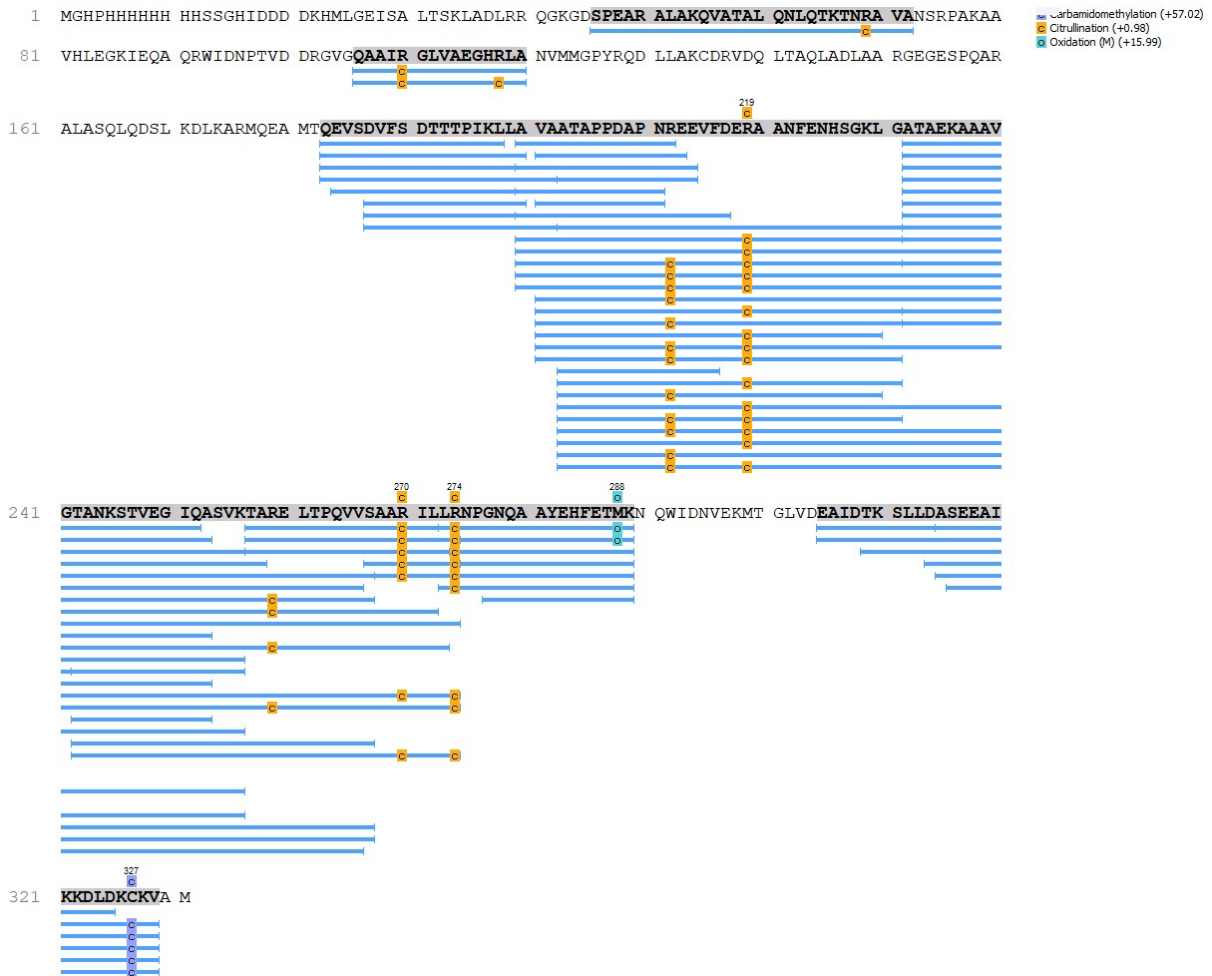

# Cit-wt-Vin 2(40%, 27 peptides)

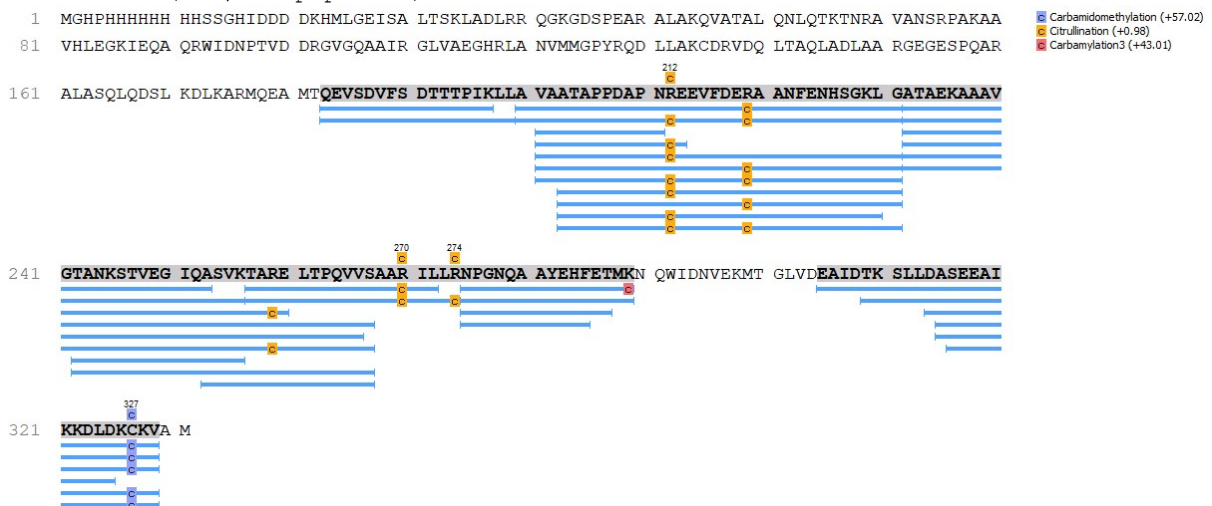

Cit-wt-Vin 3(40%, 48 peptides)

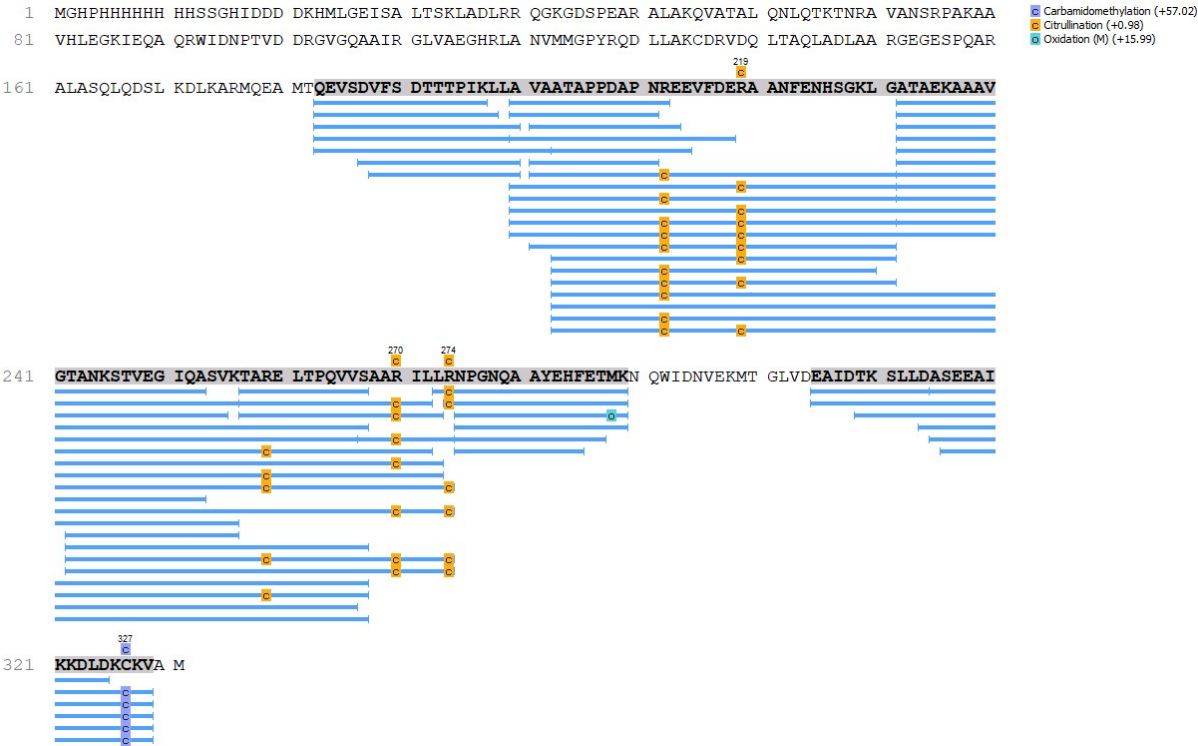

### Cit-Aha-Vin 1 (38%, 25 peptides)

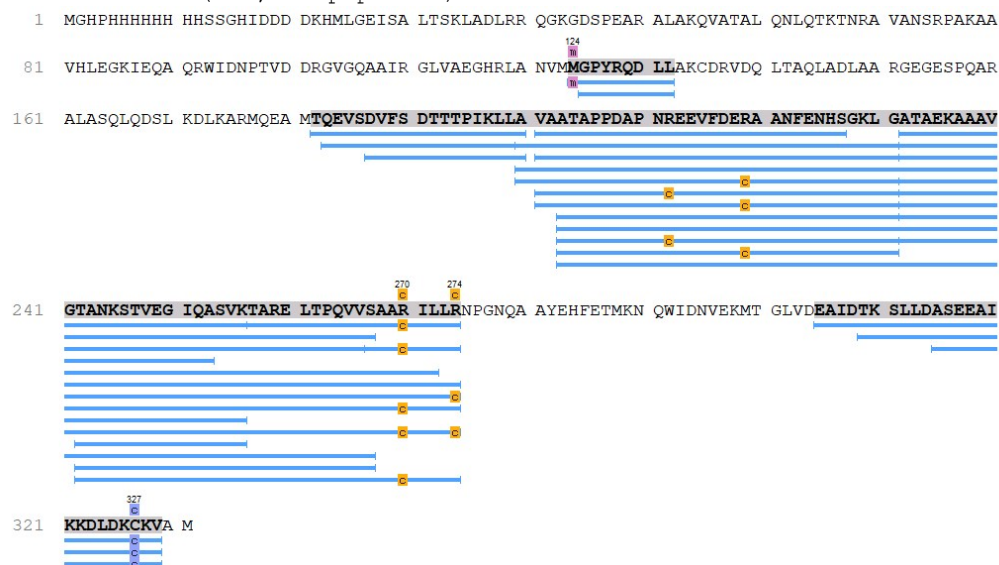

■ Carbamidomethylation (+57.02)  
■ Citrullination (+0.98)  
■ Methionine replacement by azido homocysteine (-4.99)

### Cit-Aha-Vin 2 (34%, 15 peptides)

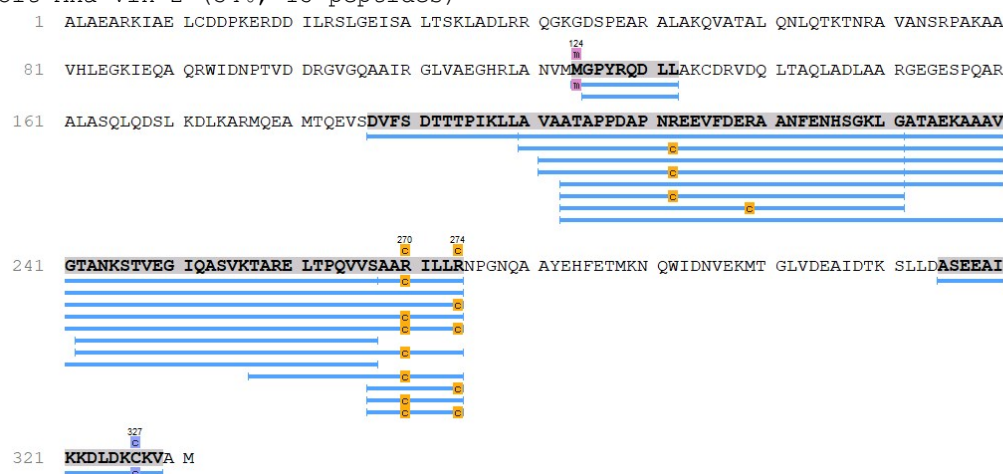

■ Carbamidomethylation (+57.02)  
■ Citrullination (+0.98)  
■ Methionine replacement by azido homocysteine (-4.99)

### Cit-Aha-Vin 3 (27%, 7 peptides)

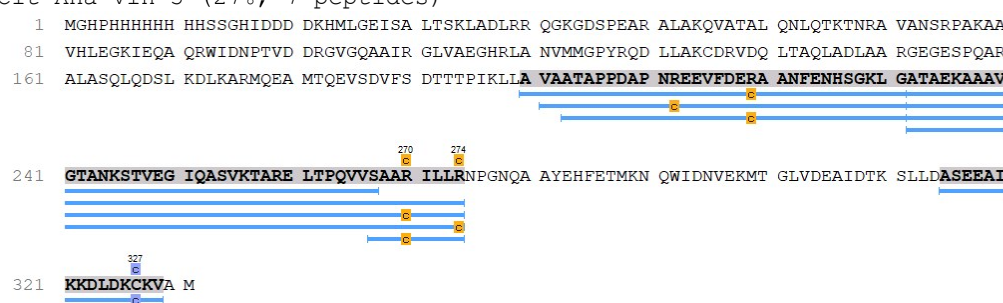

■ Carbamidomethylation (+57.02)  
■ Citrullination (+0.98)

#### Carb-wt-Vin 1 (8%, 1 peptide)

1 MGHPPHHHHH HHSSGHIDDD DKHMLGEISA LTKSLADLRQ QGKGD**SPEAR ALAKQVATAL QNLQTKTNRA** VANSRPAKAA Carbamylation3 (+43.01)  
 81 VHLEGGKIEQA QRWIDNPTVD DRGVGQAAIR GLVAEGHRLA NVMMGPYRQD LLAKCDRVDQ LTAQLADLAA RGEGESFQAR  
 161 ALASQLQDSL KDLKARMQEA MTQEVSDVFS DTTPIKLLA VAATAPPDAP NREEVFDERA ANFENHSGKL GATAEKAAAV  
 241 GTANKSTVEG IQASVKTARE LTPQVVSAAAR ILLRNPGNQA AYEHPETMKN QWIDNVEKMT GLVDEAIDTK SLLDASEEAI  
 321 KKDLCKCKVA M

#### Carb-wt-Vin 2 (8%, 1 peptide)

1 MGHPPHHHHH HHSSGHIDDD DKHMLGEISA LTKSLADLRQ QGKGD**SPEAR ALAKQVATAL QNLQTKTNRA** VANSRPAKAA Carbamylation3 (+43.01)  
 81 VHLEGGKIEQA QRWIDNPTVD DRGVGQAAIR GLVAEGHRLA NVMMGPYRQD LLAKCDRVDQ LTAQLADLAA RGEGESFQAR  
 161 ALASQLQDSL KDLKARMQEA MTQEVSDVFS DTTPIKLLA VAATAPPDAP NREEVFDERA ANFENHSGKL GATAEKAAAV  
 241 GTANKSTVEG IQASVKTARE LTPQVVSAAAR ILLRNPGNQA AYEHPETMKN QWIDNVEKMT GLVDEAIDTK SLLDASEEAI  
 321 KKDLCKCKVA M

#### Carb-wt-Vin 3 (21%, 4 peptides)

1 MGHPPHHHHH HHSSGHIDDD DKHMLGEISA LTKSLADLRQ QGKGD**SPEAR ALAKQVATAL QNLQTKTNRA** VANSRPAKAA Carbamylation3 (+43.01)  
 81 **VHLEGGKIEQA** QRWIDNPTVD DRGVGQAAIR GLVAEGHRLA NVMMGPYRQD LLAKCDRVDQ LTAQLADLAA RGEGESFQAR  
 161 ALASQLQDSL KDLKARMQEA MTQEVSDVFS DTTPIKLLA **VAATAPPDAP NREEVFDERA ANFENHSGKL GATAEKAAAV**  
 241 GTANKSTVEG IQASVKTARE LTPQVVSAAAR ILLRNPGNQA AYEHPETMKN QWIDNVEKMT GLVDEAIDTK SLLDASEEAI  
 321 KKDLCKCKVA M

#### Carb-Aha-Vin 1 (4%, 1 peptide)

1 MGHPPHHHHH HHSSGHIDDD DKHMLGEISA LTKSLADLRQ QGKGD**SPEAR ALAKQVATAL QNLQTKTNRA VANSRPAKAA** Carbamylation3 (+43.01)  
 81 **VHLEGGKIEQA** QRWIDNPTVD DRGVGQAAIR GLVAEGHRLA NVMMGPYRQD LLAKCDRVDQ LTAQLADLAA RGEGESFQAR  
 161 ALASQLQDSL KDLKARMQEA MTQEVSDVFS DTTPIKLLA VAATAPPDAP NREEVFDERA ANFENHSGKL GATAEKAAAV  
 241 GTANKSTVEG IQASVKTARE LTPQVVSAAAR ILLRNPGNQA AYEHPETMKN QWIDNVEKMT GLVDEAIDTK SLLDASEEAI  
 321 KKDLCKCKVA M

#### Carb-Aha-Vin 2 (0)

No peptides found

#### Carb-Aha-Vin 3 (0)

No peptides found

**Figure S11: Peptide coverage of vinculin variants after Cathepsin S digestion.** All vinculin variants (n=3) were subjected to CatS digestion for 1h (1:1000 CatS:Vin molar ratio). Resulting peptides were denatured, alkylated, acidified and desalted over StageTips. Samples were measured by tandem MS-MS and identified by data based search in PEAKS software. FDR was set to 0.1% and confident PTMs with ion intensity >5% are shown above the amino acid sequence.

RT: 10.0 - 30.0

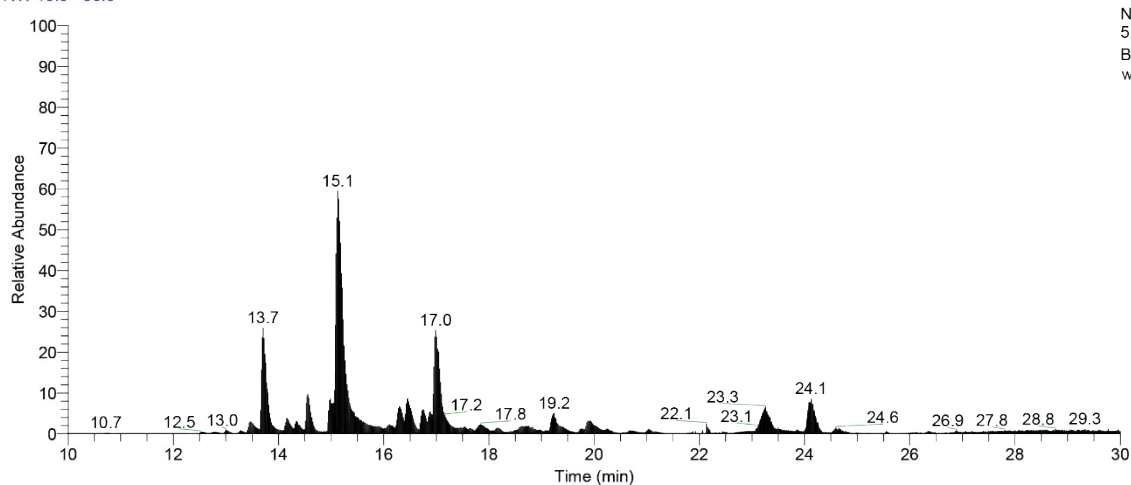

NL:  
5.00E8  
Base Peak  
wt

RT: 10.0 - 30.0

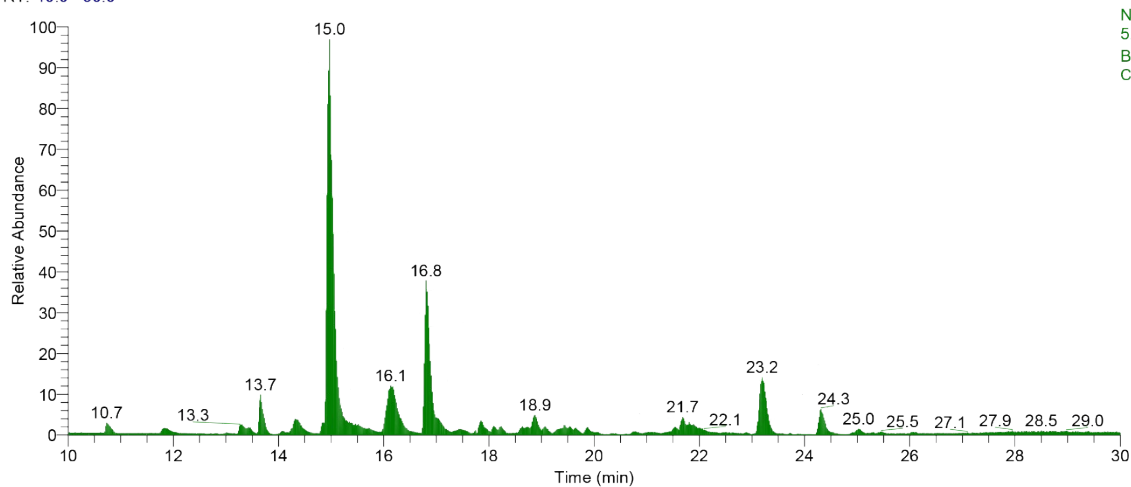

NL:  
5.00E8  
Base Peak  
Cit-wt

RT: 10.0 - 30.0

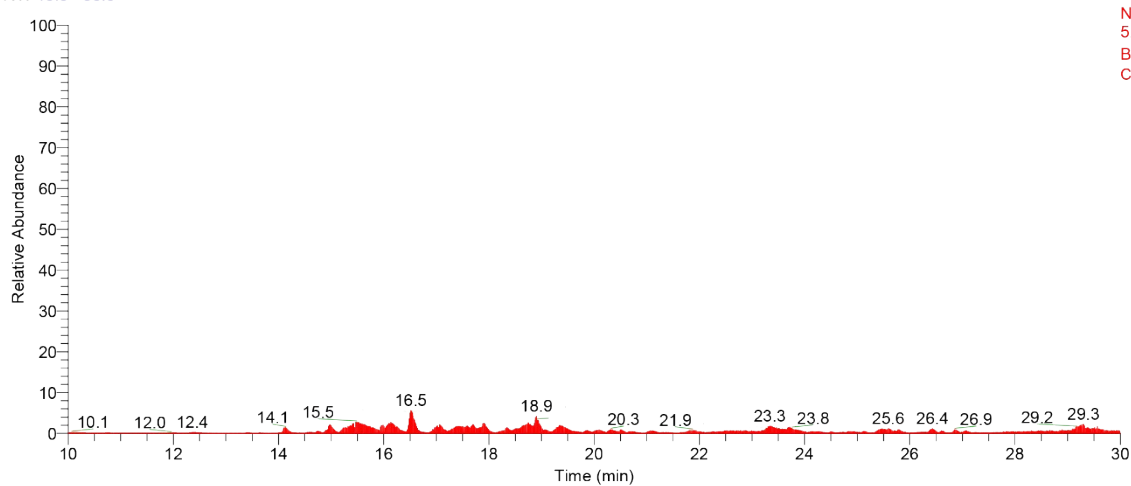

NL:  
5.00E8  
Base Peak  
Carb-wt

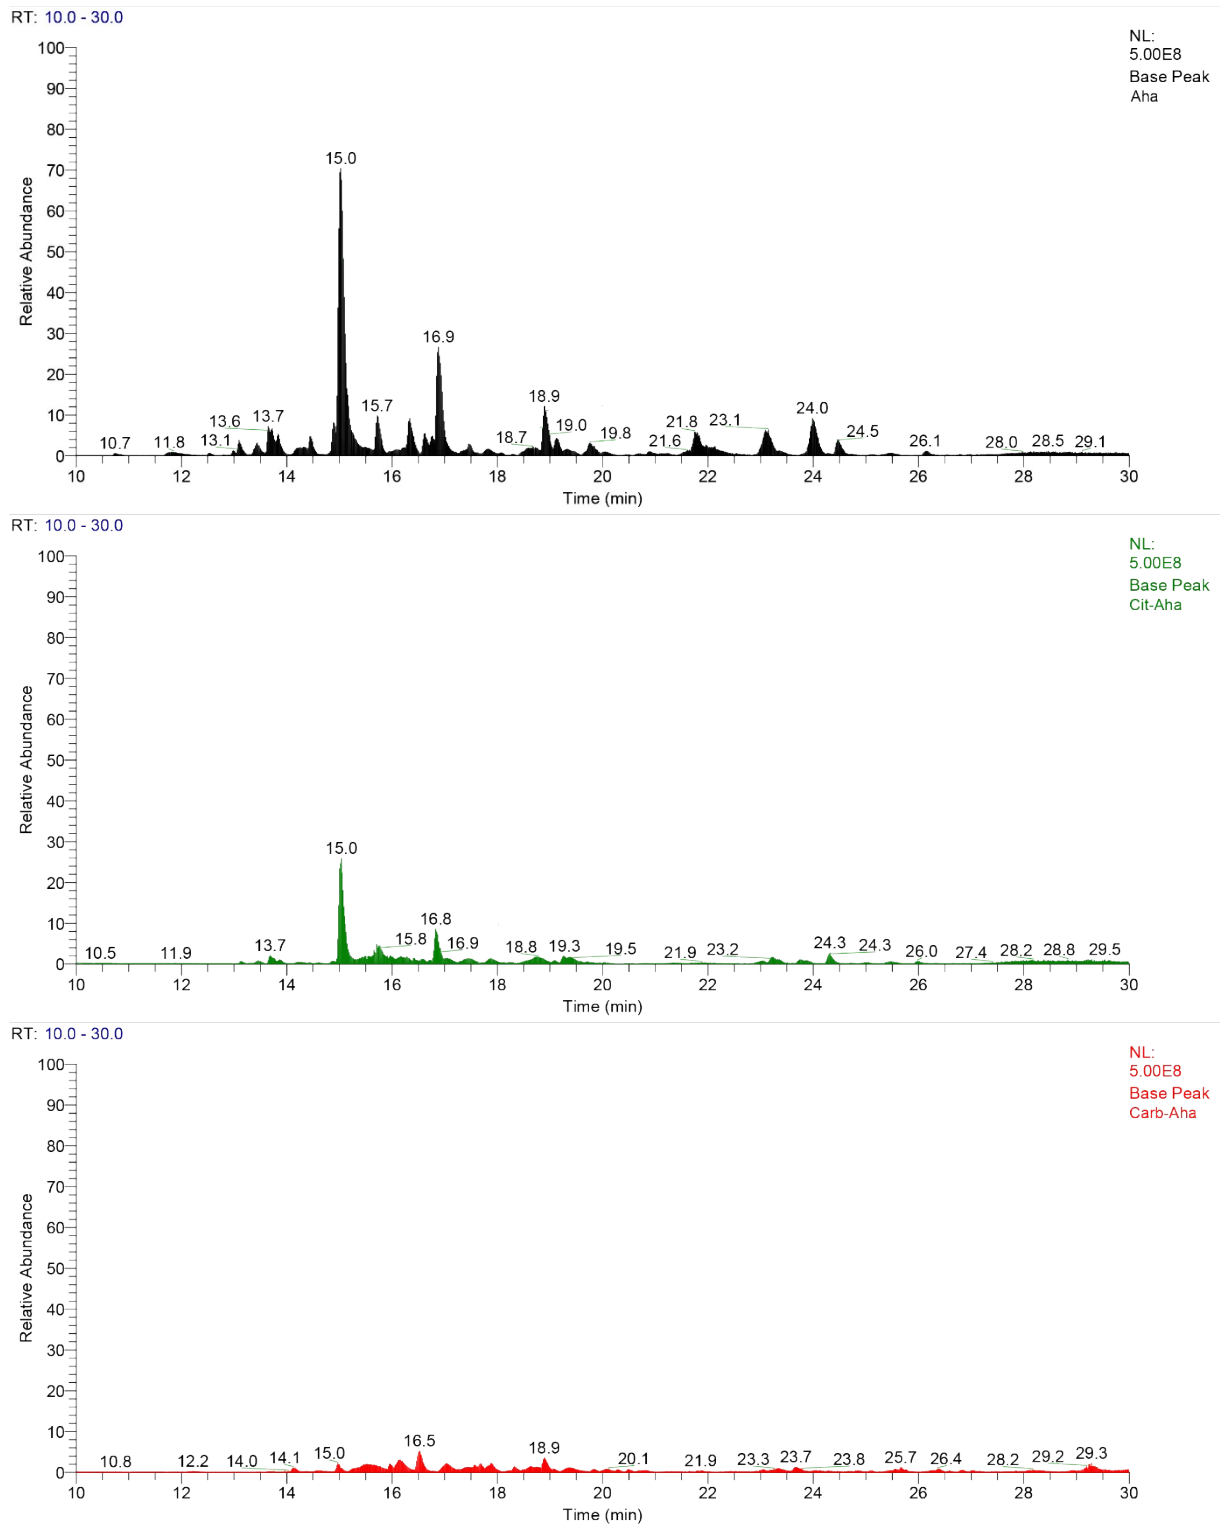

**Figure S12: MS spectra of *CatS* digested *Vin* variants.** MS RAW files of wt *vin* variants (upper panel: wt- (black), Cit-wt- (green) and carb-wt-*vin* (red), lower panel: Aha- (black), Cit-Aha- (green) and Carb-Aha-*vin* (red)) were analyzed in Qual Browser Themro Xcalibur (version 4.1.50). RT range was set to 10-30 min and the scale was fixed to 5E8.

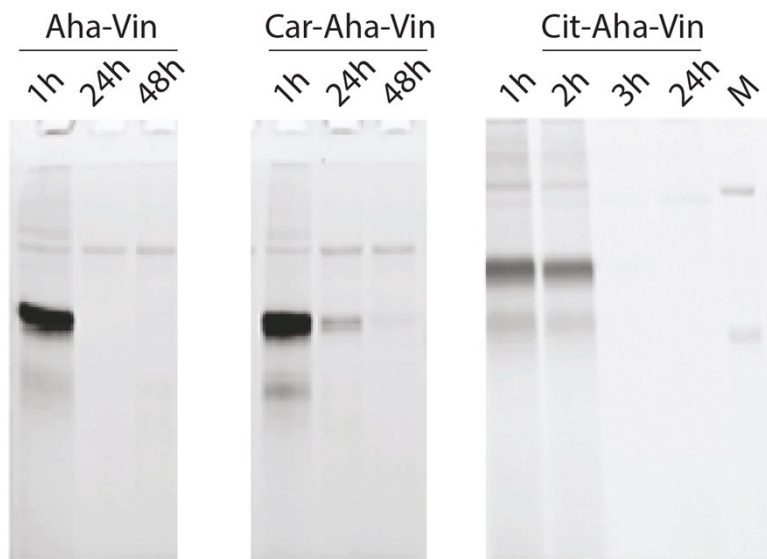

**Figure S13: Effect of post-translational modifications on vinculin degradation in BMDCs.** BMDCs were pulsed with bioorthogonal Vin variants for 2 h and chased for the indicated time points. Cells were lysed and Vin variants were subjected to ccHc with AF488-azide. Protein samples were resolved by SDS-PAGE and analysed by in-gel fluorescence. At t = 24 h only carbamylated Aha-Vin remains visible.

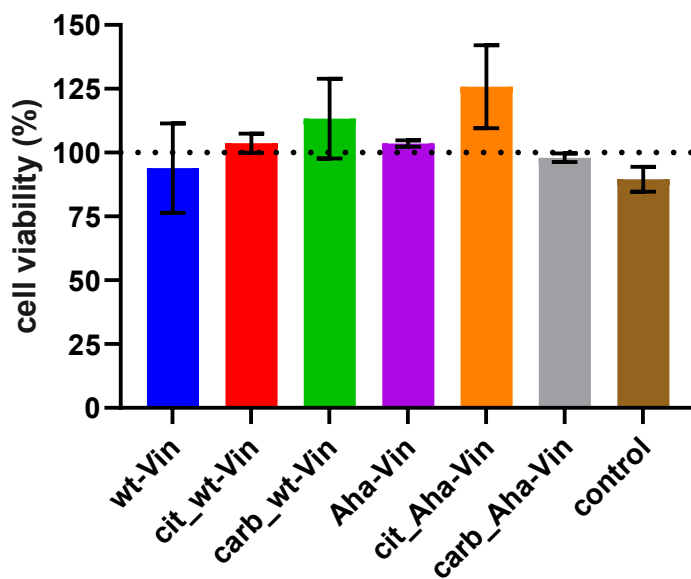

**Figure S14: MTT reducing assay for cell viability of DC 2.4s incubated with different PTM Vin variants.**

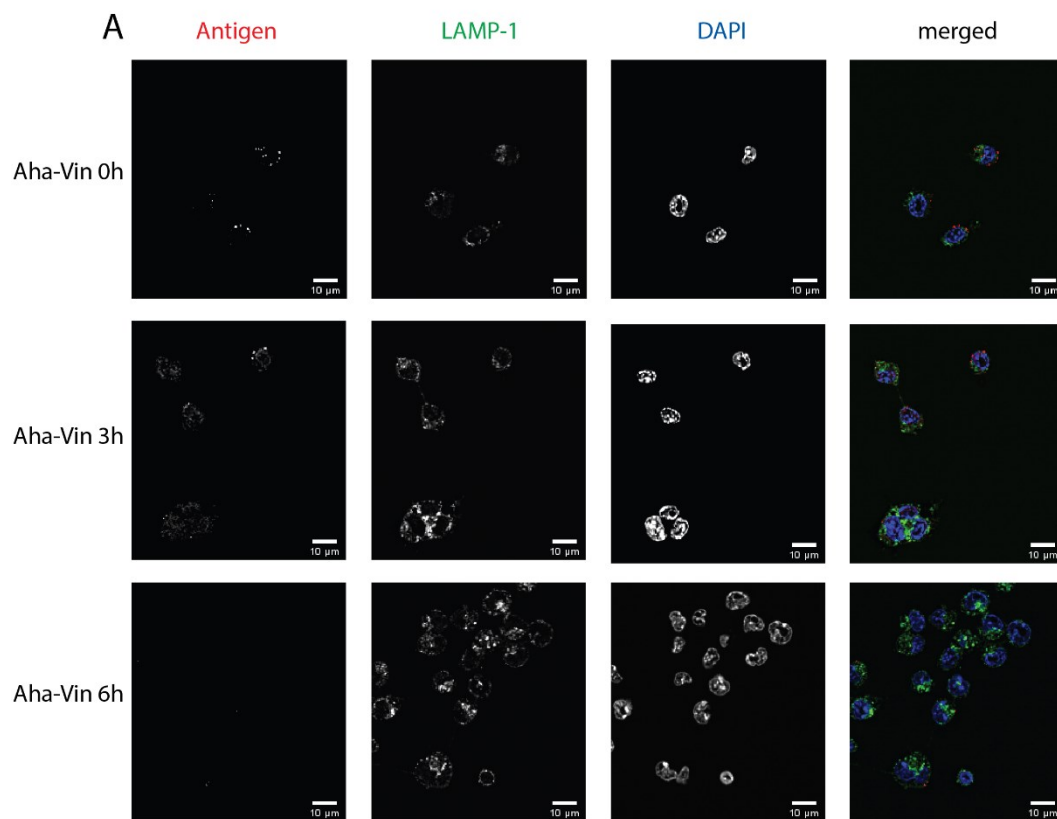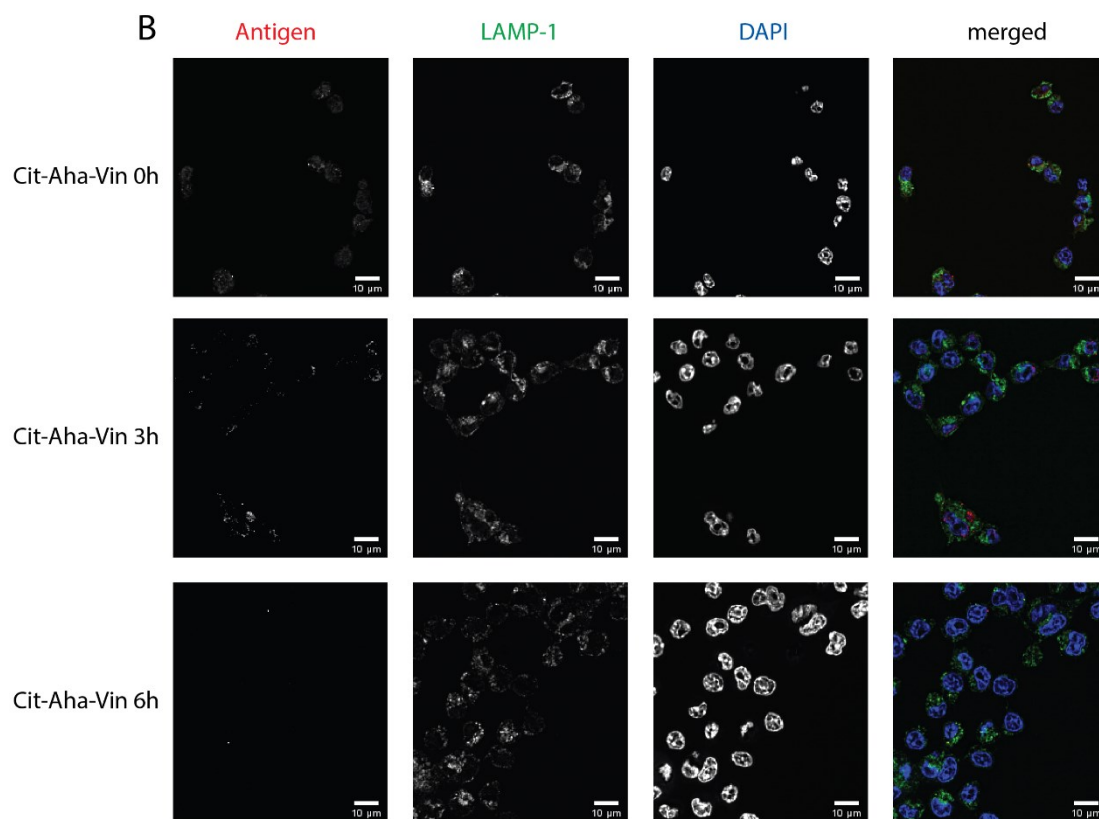

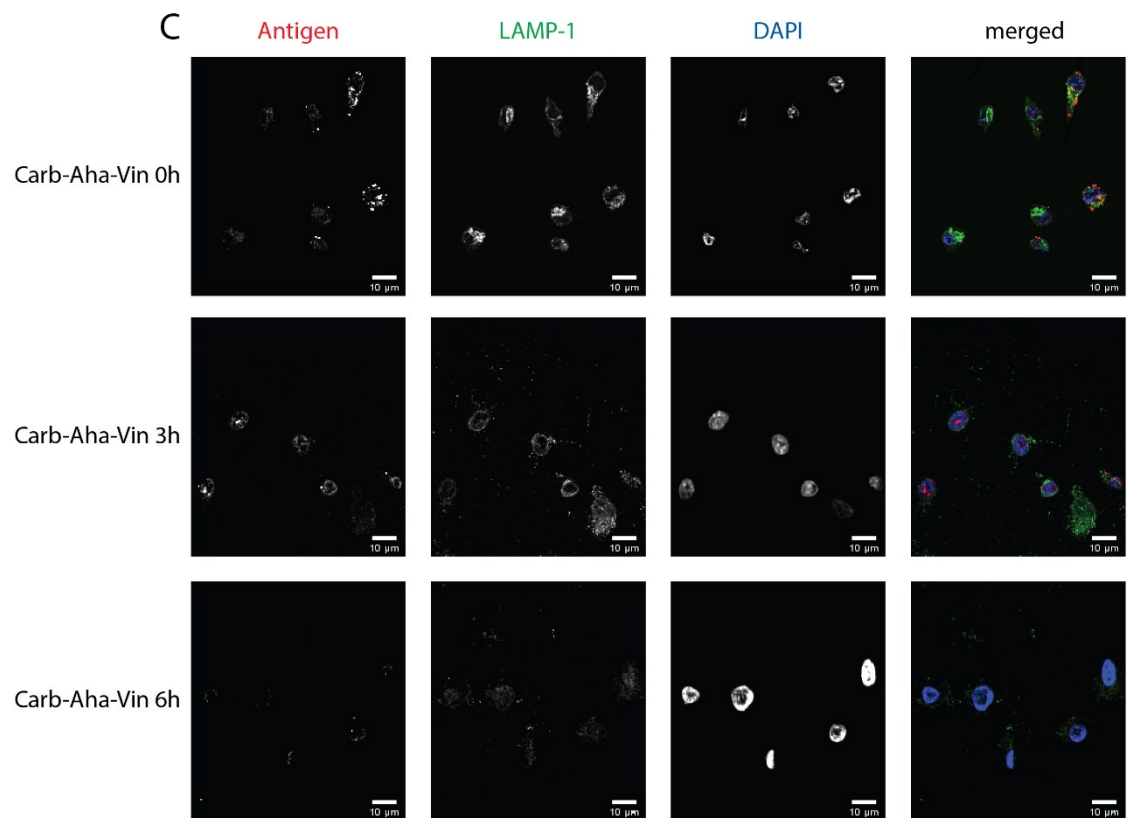

**Figure S15: Imaging processing of bioorthogonal PTM-modified Vin in DC 2.4-APCs via confocal microscopy.** DCs were incubated for 2 h (pulse) and chased for 0 h, 3 h and 6 h with non-modified (A), citrullinated (B) or carbamylated (C) Aha-Vin. Cells were fixed with 0.5% PFA and processed for immunofluorescence with LAMP-1 as a lysosomal marker (green in merged images). The nucleus was stained with DAPI (blue in merged images). Bioorthogonal Vin variants were stained via ccHc with A647-alkyne fluorophore (grey in single channel, red in merged images). Scale bar is 10  $\mu$ m (white bar, right corner).

## References

1. M. B. Lutz, N. Kukutsch, A. L. J. Ogilvie, S. Röβner, F. Koch, N. Romani and G. Schuler, *J. Immunol. Methods*, 1999, **223**, 77-92.
2. M. J. Barnden, J. Allison, W. R. Heath and F. R. Carbone, *Immunol. Cell Biol.*, 1998, **76**, 34-40.
3. A. M. F. van der Gracht, M. A. R. de Geus, M. G. M. Camps, T. J. Ruckwardt, A. J. C. Sarris, J. Bremmers, E. Maurits, J. B. Pawlak, M. M. Posthoorn, K. M. Bongers, D. V. Filippov, H. S. Overkleeft, M. S. Robillard, F. Ossendorp and S. I. van Kasteren, *ACS Chem. Biol.*, 2018, **13**, 1569-1576.
4. D. M. van Elsland, S. Pujals, T. Bakkum, E. Bos, N. Oikonomou-Koppas, I. Berlin, J. Neefjes, A. H. Meijer, A. J. Koster, L. Albertazzi and S. I. van Kasteren, *ChemBioChem*, 2018, 1766-1770
5. S. Jutz, J. Leitner, K. Schmetterer, I. Doel-Perez, O. Majdic, K. Grabmeier-Pfistershammer, W. Paster, J. B. Huppa and P. Steinberger, *J. Immunol. Methods*, 2016, **430**, 10-20.
6. S. Roskopf, J. Leitner, W. Paster, L. T. Morton, R. S. Hagedoorn, P. Steinberger and M. H. M. Heemskerk, *Oncotarget*, 2018, **9**, 17608-17619.
7. N. Del Cid, L. Shen, J. Belle Isle and M. Raghavan, *PLOS ONE*, 2012, **7**, e41727.
8. J. FANDO and S. GRISOLIA, *Eur. J. Biochem.*, 1974, **47**, 389-396.
9. M. W. Walker and E. Lloyd-Evans, in *Methods in Cell Biology*, eds. F. Platt and N. Platt, Academic Press, 2015, vol. **126**, pp. 21-43.
10. James Robinson, Dominic J Barker, Xenia Georgiou, Michael A Cooper, Paul Flicek, Steven G E Marsh, *Nucleic Acids Research*, 2020, **48**, D1, D948-D955
11. Wang, Y., T. Sosinowski, A. Novikov, F. Crawford, J. White, N. Jin, Z. Liu, J. Zou, D. Neau, H.W. Davidson, et al., *Sci. Immunol.*, 2019, **4** (34)
12. U. K. Laemmli, *Nature*, 1970, **227**, 680-685.
13. C. Arndt, S. Koristka, H. Bartsch and M. Bachmann, in *Protein Electrophoresis: Methods and Protocols*, eds. B. T. Kurien and R. H. Scofield, Humana Press, Totowa, NJ, 2012, DOI: 10.1007/978-1-61779-821-4\_5, pp. 49-53.
14. M. M. Zhang, L. K. Tsou, G. Charron, A. S. Raghavan and H. C. Hang, *Proc. Nat. Acad. Sci. U.S.A.*, 2010, **107**, 8627-8632.
15. N. Li, R. K. V. Lim, S. Edwardraja and Q. Lin, *J. Am. Chem. Soc.*, 2011, **133**, 15316-15319.
